# Genomic investigation of an outbreak of carbapenemase-producing *Enterobacter cloacae*: long-read sequencing reveals the context of *blaIMP4* on a widely distributed IncHI2 plasmid

Leah W. Roberts<sup>1,2,3</sup>, Patrick N. A. Harris<sup>4,5</sup>, Nouri L. Ben Zakour<sup>1,2,3</sup>, Brian M. Forde<sup>1,2,3</sup>, Elizabeth Catchpoole<sup>5</sup>, Mitchell Stanton-Cook<sup>1,2</sup>, Minh-Duy Phan<sup>1,2</sup>, Hanna Sidjabat<sup>4</sup>, Haakon Bergh<sup>5</sup>, Claire Heney<sup>5</sup>, Jayde A. Gawthorne<sup>1,2</sup>, Jeffrey Lipman<sup>6</sup>, Anthony Allworth<sup>7</sup>, Kok-Gan Chan<sup>8</sup>, Teik Min Chong<sup>8</sup>, Wai-Fong Yin<sup>8</sup>, Mark A. Schembri<sup>1,2</sup>, David L. Paterson<sup>2,4,9</sup>, Scott A. Beatson<sup>1,2,3</sup>

1. School of Chemistry and Molecular Biosciences, The University of Queensland, Brisbane, QLD, Australia
2. Australian Infectious Diseases Research Centre, The University of Queensland, Brisbane, QLD, Australia
3. Australian Centre for Ecogenomics, The University of Queensland, Brisbane, QLD, Australia
4. The University of Queensland, UQ Centre for Clinical Research, Brisbane, QLD, Australia
5. Pathology Queensland, Central Laboratory, Brisbane, QLD, Australia
6. Burns Trauma and Critical Care Research Centre, The University of Queensland, Brisbane, QLD, Australia
7. Infectious Disease Unit, Royal Brisbane & Women's Hospital, Brisbane, QLD, Australia
8. Division of Genetics and Molecular Biology, Institute of Biological Sciences, Faculty of Science, University of Malaya, Kuala Lumpur, Malaysia
9. Wesley Medical Research, The Wesley Hospital, Auchenflower, QLD, Australia

26 **40-word summary:** Whole genome sequencing of *bla*<sub>IMP-4</sub>-producing *Enterobacter cloacae*  
 27 detected an unknown persistent source of infection within the hospital. All isolates were found to  
 28 carry multiple antibiotic resistance genes, located in a large multidrug resistant region on a 330,060  
 29 bp IncHI2 plasmid.

30  
 31 **Key words:** *bla*<sub>IMP-4</sub>; carbapenem resistant, whole genome sequencing; plasmid; carbapenemase-  
 32 producing Enterobacteriaceae (CPE)

33  
 34 **Word count (main text):** 3,069

35  
 36 **Corresponding author:**  
 37 Associate Professor Scott A. Beatson, School of Chemistry and Molecular Biosciences, The  
 38 University of Queensland, Brisbane 4072, QLD, Australia  
 39 Telephone +61-7-33654863  
 40 Email [s.beatson@uq.edu.au](mailto:s.beatson@uq.edu.au)

41  
 42 **Alternative corresponding author:**  
 43 Dr Patrick N. A. Harris, UQ Centre for Clinical Research, The University of Queensland, Brisbane,  
 44 QLD, Australia  
 45 Telephone +61 7 3346 5555  
 46 Email [p.harris@uq.edu.au](mailto:p.harris@uq.edu.au)

47

# **Abstract**

49

50 **Background:** We describe whole genome sequencing (WGS) to analyse a cluster of *bla*<sub>IMP-4</sub>  
51 carbapenemase-producing *Enterobacter cloacae*.

52 **Methods:** A cluster of carbapenemase-producing *E. cloacae* were identified over a two month  
53 period in 2015 within an Intensive Care Unit (ICU)/Burns Unit in Brisbane, Australia. Phylogenetic  
54 relationships based on core single nucleotide polymorphisms (SNPs) were determined using WGS.  
55 Genomic comparisons were made to IMP-producing Enterobacteriaceae from neighbouring  
56 hospitals and to publicly available genomes to contextualise the isolates in the broader community.  
57 Pacific Biosciences Single Molecule Real-Time (SMRT) sequencing of one IMP-4-producing *E.*  
58 *cloacae* strain was used to resolve the full context of the resistance genes.

59 **Results:** All outbreak strains were sequence type 90 and differed by only four core SNPs. WGS  
60 analysis unequivocally linked all 10 isolates to a 2013 isolate from the same ward, confirming the  
61 hospital environment as the most likely original source of infection in the 2015 cases. No clonal  
62 relationship was found to IMP-4-producing isolates identified from other local hospitals. However,  
63 all IMP-4-producing strains were found to possess an identical *bla*<sub>IMP-4</sub> carried on a large IncHI2  
64 plasmid.

65 **Conclusions:** During the course of an outbreak investigation, WGS revealed the transmission  
66 dynamics of a carbapenemase-producing *E. cloacae* cluster, linking it to a historical isolate from the  
67 same Unit and revealing the full context of *bla*<sub>IMP-4</sub> on a multi-drug resistant IncHI2 plasmid that  
68 appears to be widely distributed in Australia.

69

70 **Abstract word count:** 228

71

72 **Introduction:**

73 Carbapenem antibiotics have become the mainstay of therapy for serious infections caused by  
 74 multidrug resistant (MDR) Gram-negative bacteria, especially for strains expressing extended-  
 75 spectrum beta-lactamase (ESBL) or AmpC-type enzymes [1]. Increased use has driven resistance to  
 76 carbapenems and the emergence of carbapenemase-producing Enterobacteriaceae (CPE) and  
 77 carbapenem-resistant Enterobacteriaceae (CRE), which include common enteric species such as  
 78 *Escherichia coli*, *Klebsiella pneumoniae* and *Enterobacter* spp. [2].

79

80 Before 2005, an estimated 99.9% of Enterobacteriaceae were susceptible to carbapenems [3].  
 81 However, the isolation of CRE has since increased dramatically and these organisms are now  
 82 reported in all WHO health regions [4]. The mortality rates for CRE infections are reported to be as  
 83 high as 48% [5], and resistance to last-line antibiotics used in lieu of carbapenems, such as colistin,  
 84 has also emerged [6].

85

86 Resistance to carbapenems in Enterobacteriaceae occurs via a range of mechanisms. Of greatest  
 87 concern is the acquisition of genes encoding carbapenemases [7]. This most frequently occurs via  
 88 transfer of mobile genetic elements, such as plasmids, occasionally carrying multiple  $\beta$ -lactamases  
 89 co-located with other resistance determinants, rendering these strains MDR or extensively drug-  
 90 resistant (XDR) [8]. Australia has experienced low rates of CRE [9], although sporadic introduction  
 91 of *K. pneumoniae* carbapenemase (KPC) [10] and New Delhi metallo-beta-lactamase (NDM) [11]  
 92 has been reported, including significant nosocomial outbreaks [12]. The most frequently  
 93 encountered carbapenemase in Australia is *bla*<sub>IMP-4</sub>, particularly in *Enterobacter* spp. [13]. IMP-  
 94 producing *Enterobacter* spp. have caused occasional outbreaks within intensive care or burns units  
 95 in Australian hospitals [14-16].

96

97 Here, we describe the use of whole genome sequencing (WGS) to investigate an outbreak of IMP-  
98 4-producing *Enterobacter cloacae* within an Intensive Care Unit (ICU) and Burns facility.

99

# 100 **Clinical case report**

101 Two patients in mid 2015 were transferred from regional Queensland hospitals to the ICU with burn  
102 injuries sustained from the same accident (Figure 1). *E. cloacae* was cultured from the endotracheal  
103 tube (ETT) of patients 1 and 2 on day 6 and 8 of admission, respectively. Both *E. cloacae* were  
104 confirmed as MDR by phenotypic testing used in the diagnostic setting (Table 1). Real-time PCR  
105 amplification of *bla*<sub>IMP-4</sub> confirmed their status as carbapenemase-producers. Both of these patients  
106 were previously well, with no prior hospital admission or contact with healthcare facilities. Neither  
107 had been resident or hospitalized overseas for more than 20 years.

108

109 Patient 1 underwent debridement and split skin grafting for 29% total body surface area burns on  
110 day 2 of ICU admission and subsequently had 3 procedures in the burns operating rooms (Figure 1).  
111 An additional MDR-*E. cloacae* was isolated from urine on day 21, eight days after discharge from  
112 the ICU. After no further colonisation of MDR-*E. cloacae*, Patient 1 was discharged from the  
113 hospital on day 38.

114

115 Patient 2 underwent multiple grafting and debridement procedures and was discharged from the  
116 ICU on day 17 (Figure 1). MDR-*E. cloacae* colonisation from the ETT and from urine was noted on  
117 day 8 and day 15, respectively. By day 19, the patient developed clinical signs of sepsis, with a  
118 phenotypically identical isolate identified in blood cultures and from a central venous line (CVL)  
119 tip culture. She received piperacillin/tazobactam 4.5 grams 8-hourly for 2 days, improved following  
120 line removal and did not receive further antibiotics for this episode. A subsequent *E. cloacae*  
121 isolated from urine collected from a urinary catheter 17 days later demonstrated a different

antibiogram with susceptibility to third generation cephalosporins, meropenem and gentamicin. She received 3 days of oral norfloxacin 400mg twice daily with microbiological resolution.

Patient 3, a 39-year old woman, was admitted with 66% total body surface area burns to the same ICU 5 weeks after Patient 1 and 2 were admitted and 20 days after they had been discharged from the ICU (Figure 1). MDR-*E. cloacae* was cultured from the ETT of Patient 3 on day 12 of ICU admission. She had frequent brief admissions to several hospitals since 2010 (never to ICU), and no MDR Gram-negative bacilli were identified in clinical or screening samples during previous admissions. MDR-*E. cloacae* with *Pseudomonas aeruginosa* were isolated from 8 skin swabs and an additional ETT aspirate. On days 19 and day 21, MDR-*E. cloacae* were isolated from blood cultures in the context of skin graft breakdown and signs of systemic inflammatory response syndrome (SIRS) with increasing inotrope requirements (Figure 1). *Streptococcus mitis* was cultured from blood on day 19. On day 36, her condition worsened with signs of SIRS. Transesophageal echocardiography demonstrated aortic and mitral valve lesions consistent with endocarditis. Pancytopenia developed, with a bone marrow aspirate and trephine suggestive of peripheral consumption. Multiple suspected cerebral, pulmonary, splenic and renal septic emboli were identified on imaging. She was palliated on day 47 of admission due to extensive cerebral emboli (Figure 1).

## **Materials & Methods**

### **Study setting**

Primary isolates were obtained from patients admitted to the Royal Brisbane & Women's Hospital (RBWH), a tertiary referral hospital with 929 beds in South-East Queensland, Australia. Additional IMP-producing isolates, cultured from patients admitted to other hospitals in the metropolitan Brisbane area (referred to as Hospital A and B), were obtained from the Central Laboratory of Pathology Queensland for comparison (Table S3).

148

## 149 **Antimicrobial susceptibility testing and carbapenemase detection**

150 All bacterial isolates were identified by matrix-assisted laser desorption/ionization mass  
151 spectrometry (MALDI-TOF) (Vitek MS; bioMérieux, France). Antimicrobial susceptibility testing  
152 was carried out using Vitek 2 automated AST-N426 card (bioMérieux) with Etest to determine  
153 MICs for meropenem, imipenem and ertapenem. Carbapenemase activity was assessed by the use  
154 of the Carba-NP test (RAPIDEC; bioMérieux) and the presence of the *bla*<sub>IMP-4-like</sub> carbapenemase  
155 gene confirmed using an in-house multiplex real-time PCR (also targeting NDM, KPC, VIM and  
156 OXA-48-like carbapenemases) [17].

157

## 158 **Bacterial DNA extraction**

159 Single colonies were selected from primary bacterial cultures and grown in 10 mL Lysogeny broth  
160 (LB) at 37°C overnight (shaking 250rpm). DNA was extracted using the UltraClean® Microbial  
161 DNA Isolation Kit (MO BIO Laboratories) as per manufacturer instructions.

162

## 163 **Genome sequencing, Quality Control and De Novo Assembly**

164 All isolates in this study were sequenced using Illumina (see supplementary appendix). Reads  
165 passing quality control (QC) were assembled using Spades v3.6.0 [18] under default parameters  
166 (without careful flag). Contigs with coverage less than 10x were removed from final assemblies.  
167 Final assembly metrics were checked using QUAST v2.3 [19] (Table S3).

168

## 169 **Phylogenetic analysis**

170 SHRiMP (v2.2.3) [20] (as implemented in Nesoni v0.130 [21] under default settings) was used to  
171 determine core single nucleotide polymorphisms (SNPs) between the ten 2015 RBWH *E. cloacae*  
172 genomes to the reference Ecl1 and create a minimal-spanning tree. Further details of the Ecl1  
173 assembly and SNP-calling process are provided in the supplementary appendix. Maximum likelihood

174 trees of Ecl1 and the 6 *E. cloacae* from hospitals A and B were built using RAxML (v8.1.15) [22]  
 175 based on the Nesoni core SNPs. RAxML was run with the GTRGAMMA nucleotide substitution rate  
 176 and an initial seed length of 456 (bootstrap 1000 with Lewis ascertainment correction). Core genome  
 177 size was estimated using Parsnp v1.2 [23].

178

## 179 **Multi-locus Sequence Typing (MLST), Plasmid Typing and Antimicrobial Resistance (AMR)**

### 180 **Gene Profiling**

181 MLST of isolate raw reads was performed using srst2 v0.1.5 [24] with typing schemes available on  
 182 PubMLST (<http://pubmlst.org/>). Plasmid replicon typing was done based on Compain *et al.* [25].  
 183 Antibiotic resistance genes were detected using the ResFinder database [26] and the ARG-ANNOT  
 184 database [27] with BLASTn and srst2 [24] respectively. Manual confirmation was carried out using  
 185 BLASTn and read mapping using Burrows-Wheeler Aligner (BWA v0.7.5a-r405) [28]. Further  
 186 details of whole genome comparisons and phage analysis are given in the supplementary appendix.

187

### 188 **Pacific Biosciences (PacBio) Single Molecule Real-Time (SMRT) Sequencing**

189 A representative *E. cloacae* isolate from patient 1 (MS7884) was grown on LB agar at 37°C  
 190 overnight. IMP positive colonies (determined by colony PCR) were grown overnight in 15 ml LB  
 191 broth with 2 µg/ml meropenem to avoid plasmid loss. Genomic DNA was extracted using  
 192 UltraClean® Microbial DNA Isolation Kit (MoBio) as per manufacturer instructions. 18.7 µg of  
 193 DNA was prepared for sequencing using an 8-12 kb insert library and sequenced on a PacBio RSII  
 194 sequencer using 1 SMRT cell. Further details of the assembly, annotation methods and plasmid  
 195 stability in MS7884 are given in the supplementary appendix.

196

### 197 **Accession numbers**

198 Genome data has been deposited under Bioproject PRJNA383436. Illumina raw  
 199 reads (SRS2350257-SRS2350273) and PacBio raw reads (SRX2999346-SRX2999347) have been



deposited in the Sequence Read Archive. The MS7884A chromosome (CP022532), pMS7884A plasmid (CP022533), and pMS7884B plasmid (CP022534) have been deposited in GenBank.

## **Results**

### **All three patients carry carbapenemase-producing *E. cloacae***

With the exception of MS7889 (isolated from the urine of Patient 2 on day 36), all *E. cloacae* isolates collected from the outbreak were resistant to ceftriaxone, ceftazidime, ticarcillin-clavulanate, piperacillin-tazobactam, meropenem, gentamicin and trimethoprim-sulphamethoxazole by Vitek 2 testing (Table 1) and demonstrated carbapenemase production by Carba-NP. The MICs for meropenem were considerably lower when tested by Etest [29], often falling below the clinically susceptible breakpoint defined by EUCAST, but above the epidemiological cut-off (ECOFF) [30]. MS7889 was fully susceptible to carbapenems (meropenem MIC=0.032 by Etest) and was negative for IMP-4-like genes by PCR (Table 1).

### **Whole genome sequencing identifies a link to a previous IMP-producing isolate**

WGS of 10 isolates from patients 1, 2 and 3 was initiated after microbiological confirmation of a *bla*<sub>IMP-4</sub> *E. cloacae* isolate from a third patient from the RBWH ICU (Figure 1). *In silico* MLST showed all belonged to sequence type (ST) 90 with the majority exhibiting the same resistance gene profile, including a 100% identical *bla*<sub>IMP-4</sub> gene (Table 1). The exception was the carbapenem susceptible isolate MS7889, which was confirmed by WGS to have lost the *bla*<sub>IMP-4</sub> gene as well as several additional resistance genes conserved in the other *E. cloacae* isolates (Table 1). All ten isolates contained an IncHI2 plasmid. Sequence analysis suggests that AmpC derepression is unlikely to contribute to carbapenemase activity in these strains (further details are given in the supplementary appendix).

226 Comparison of the *E. cloacae* genomes to publicly available draft assemblies identified a close  
 227 match to *E. cloacae* Ecl1 (GenBank: JRFQ01000000), an ST90 strain isolated from a burns patient  
 228 at the RBWH ICU almost two years prior to the 2015 outbreak [13, 31]. Antibiotic resistance  
 229 profiling of the Ecl1 genome revealed an identical resistance profile compared to the majority of the  
 230 2015 isolates (Table 1).

231

232 **The 2015 outbreak isolates were near identical at the core genome level to an isolate from**  
 233 **2013**

234 To investigate the relationship between the isolates at single-nucleotide resolution, reads from the  
 235 2015 RBWH isolates were mapped to *E. cloacae* draft assembly for Ecl1. All 2015 RBWH isolates  
 236 differed by fewer than five core SNPs (4,934,357 bp core genome), consistent with a direct  
 237 ancestral relationship (Figure 2). Two isolates from Patient 1 and two isolates from Patient 3 were  
 238 indistinguishable at the core genome level (Figure 2), although all of the isolates from Patient 3 had  
 239 lost a prophage region (refer supplementary appendix). Ecl1 (isolated in 2013) was very closely  
 240 related to these isolates, differing by only one core SNP. All four isolates from Patient 2 contained a  
 241 discriminatory single-nucleotide deletion, thereby ruling out Patient 2 to Patient 3 transmission  
 242 (Figure 2).

243

244 **Integration of WGS with infection control response**

245 WGS analysis unequivocally linked all 10 isolates to the 2013 isolate Ecl1 from the same ward,  
 246 confirming that the clone had not been an incursion from the accident affecting Patient 1 and 2 and  
 247 that the hospital environment was suspected as the most likely original source of infection in the  
 248 2015 cases. In response, 28 environmental samples from the ICU, burns wards and operating  
 249 theatres were collected 65 days after patient 1 and 2 were admitted and inoculated onto MacConkey  
 250 agar with 8 mg/mL gentamicin (laboratory standard screening medium for MDR Gram-negative  
 251 bacilli). No carbapenemase-producing *Enterobacter* spp. were detected. Additionally, no

252 carbapenemase-producing *Enterobacter* spp. were detected in patients admitted to the ICU or burns  
253 unit for a 6-month period following the outbreak.

254

## 255 **Sequencing of additional CPE isolates identify a circulating IMP-4-carrying plasmid in** 256 **Queensland**

257 To determine the broader context of IMP-producing Enterobacteriaceae in surrounding hospitals,  
258 seven additional *bla*<sub>IMP-4</sub> producing Enterobacteriaceae (*E. cloacae* n=6, *E. coli* n=1) were  
259 sequenced. These represented all *bla*<sub>IMP-4</sub> producing Enterobacteriaceae identified from Brisbane  
260 public hospitals via Pathology Queensland for 2015. Both MLST and SNP analysis found no  
261 relationship to the 2015 RBWH *E. cloacae*, with approximately 50,000 SNP differences between  
262 the ST90 representative strain Ecl1 and its nearest non-ST90 phylogenetic neighbour (Figure 3, also  
263 see supplementary appendix). Despite not being clonally related, all additional Enterobacteriaceae  
264 isolates possessed very similar antibiotic resistance gene profiles (Table S3), suggesting the  
265 possibility of lateral gene transfer via mobile genetic elements (e.g. integrons and/or plasmids).  
266 WGS analysis revealed that all 18 CPE isolates in this study, including the *E. coli* isolate, harbored  
267 an IncHI2 plasmid (plasmid ST1) and an identical *bla*<sub>IMP-4</sub> gene, strongly suggesting plasmid-  
268 mediated circulation of *bla*<sub>IMP-4</sub> between Enterobacteriaceae in Brisbane hospitals.

## 269 270 ***bla*<sub>IMP-4</sub> resides in the class 1 integron In809 on an IncHI2 plasmid**

271 Due to the presence of multiple repetitive elements surrounding *bla*<sub>IMP-4</sub>, including insertion  
272 sequences (IS) and two suspected integrons with similar gene content, we were unable to accurately  
273 resolve the context of *bla*<sub>IMP-4</sub> using Illumina sequencing alone. One representative isolate  
274 (MS7884) was sequenced twice using PacBio SMRT sequencing, which was able to resolve a  
275 complete closed chromosome of 4,810,853 bp and two plasmids: pMS7884A, a 330,060 bp IncHI2  
276 plasmid carrying *bla*<sub>IMP-4</sub> within a ~55 kb MDR region (Figure 4A), and pMS7884B, a smaller  
277 untypeable plasmid of 126,208 bp. The pMS7884A MDR region harbours two different class 1

integrons (In37 and In809) as well as a composite transposon conferring resistance to tetracycline and chloramphenicol (Figure 4A). BLASTn and read-mapping analysis revealed the presence of identical plasmids in all but one of the 18 isolates sequenced by Illumina in this study: isolate MS7889 is predicted to have lost a ~34 kb region from its MDR plasmid, including *bla*<sub>IMP-4</sub>, due to homologous recombination between two almost identical aminoglycoside resistance genes (Figure 4B). Notably in 15% of cases, sub-culture of MS7884 in the absence of meropenem selection resulted in loss of *bla*<sub>IMP-4</sub> or the entire plasmid. Further details of the complete MS7884 genome and plasmid analysis are presented in the supplementary appendix.

## Discussion

While there has been a dramatic improvement in the cost and availability of whole genome sequencing (WGS), it is not clear how these advances can best be incorporated into routine clinical microbiology. Several studies have demonstrated the ability of WGS to provide optimal discrimination between strains to help inform a response to outbreaks or nosocomial acquisition [32-35]. Here, we demonstrate that WGS can help rapidly characterize an outbreak in a critical care setting, particularly regarding transmission pathways.

The finding that the outbreak strains were virtually indistinguishable from an IMP-4-producing *E. cloacae* isolated two years previously from the same unit was unexpected and highlighted the need to consider environmental sources and potential person-to-person transmission, as has been previously described in Australian ICU and burns units [14]. Although we were unable to isolate any IMP-producing *Enterobacter* spp. from environmental sampling, it is possible that this may have been due to enhanced cleaning and additional infection control measures. Healthcare workers are also a possible reservoir, with previous studies confirming carriage of a range of clinically important bacteria [36-38].

304 Using SMRT sequencing technology, we determined the full context of *bla*<sub>IMP-4</sub> and its location  
 305 within a large, complex and highly repetitive MDR region harbouring two integrons: In37 and  
 306 In809. In37 is a widespread class 1 integron that has been found in many bacterial species [39, 40].  
 307 In809, which carries *bla*<sub>IMP-4</sub>, has previously been described from *Klebsiella pneumoniae*  
 308 (GenBank: KF250428.1, HQ419285.1, AJ609296.3), *E. cloacae* (GenBank: JX101693.1) and  
 309 *Acinetobacter baumannii* (GenBank: AF445082.1, DQ532122.1) in various plasmid backgrounds  
 310 including IncA/C2 [41], IncL/M and IncF [42]. Most recently, a carbapenemase-producing  
 311 *Salmonella* sp. isolated from a domestic cat in Australia was shown to contain *bla*<sub>IMP-4</sub> within an  
 312 IncHI2 MDR plasmid (pIMP4-SEM1) [43]. Remarkably, we found that pIMP4-SEM1 was near  
 313 identical to pMS7884A (Figure S5). This finding highlights the role of domestic animals (or the  
 314 food they eat) as a reservoir for antibiotic resistance genes.

315

316 Analysis of several CPE in this study suggested that a common plasmid or integron carrying  
 317 multiple antibiotic resistance genes is likely the major driver of antibiotic resistance dissemination  
 318 across a broad range of Enterobacteriaceae. In addition to the presence of *bla*<sub>IMP-4</sub>, four resistance  
 319 genes (*bla*<sub>TEM-1b</sub>, *bla*<sub>IMP-4</sub>, *qnrB*, and *aac(6')-Ib*) carried by these isolates were previously detected  
 320 by PCR in the majority of 29 IMP-4-producing *E. cloacae* isolates surveyed from Queensland  
 321 hospitals between June 2009 to March 2014 [13]. Only one of these isolates was ST90, suggesting  
 322 lateral transfer of these genes to different *Enterobacter* clones in Queensland before 2013.

323

324 There were significant discrepancies between meropenem MICs according to the testing modality  
 325 used, with the Etest consistently testing as “susceptible/intermediate” (MIC ≤4 mg/L; range 0.5-4  
 326 mg/L) and Vitek2 as “resistant” (usually with MICs ≥16 mg/L). According to  
 327 pharmacokinetic/pharmacodynamic (PK/PD) principles, provided the MIC to a carbapenem falls  
 328 within a susceptible range, the agent may still be effective despite the presence of a carbapenemase  
 329 [44]. Robust clinical data to help guide therapy are lacking and many clinicians rely on combination

therapy to optimize efficacy against carbapenemase-producers, largely based on observational studies suggesting benefit [45, 46]. The presence of carbapenemase genes may be missed if clinical breakpoints for carbapenem MICs are used [30], however it can be rapidly ascertained by WGS, without *a priori* assumptions of which genes are likely to be present. A wealth of additional information that may influence clinical decisions can be obtained, such as the presence of other  $\beta$ -lactamases, factors that may regulate resistance gene expression (e.g. IS elements), mutations in outer-membrane proteins, or other known resistance genes.

## **Conclusions**

We used WGS to help elucidate genetic relationships between *bla*<sub>IMP-4</sub> carbapenemase-producing *E. cloacae* identified from our ICU and Burns facility. Real-time application of this technology revealed an unexpected clonal relationship with a strain isolated from the same unit two years previously. Comparison with other Enterobacteriaceae containing *bla*<sub>IMP-4</sub> isolated from surrounding hospitals revealed its carriage on a broad host range IncHI2 plasmid, assumed to be circulating via lateral gene transfer across different *E. cloacae* clones and also *E. coli*. SMRT sequencing enabled the genetic context of all resistance genes within this plasmid to be resolved and revealed the mechanism of loss of resistance genes in one *E. cloacae* strain that reverted to a fully carbapenem-susceptible phenotype. As WGS technologies become increasingly available, they are likely to prove an essential tool for the clinical microbiology laboratory to respond to emergent infection control threats, and can be used in real-time to provide clinically meaningful information.

## 352 **References:**

353

- 354 1. Paterson DL, Bonomo RA. Extended-spectrum beta-lactamases: a clinical update. Clin  
355 Microbiol Rev **2005**; 18(4): 657-86.
- 356 2. Gupta N, Limbago BM, Patel JB, Kallen AJ. Carbapenem-resistant Enterobacteriaceae:  
357 epidemiology and prevention. Clin Infect Dis **2011**; 53(1): 60-7.
- 358 3. Sader HS, Biedenbach DJ, Jones RN. Global patterns of susceptibility for 21 commonly  
359 utilized antimicrobial agents tested against 48,440 Enterobacteriaceae in the SENTRY  
360 Antimicrobial Surveillance Program (1997-2001). Diagn Microbiol Infect Dis **2003**; 47(1):  
361 361-4.
- 362 4. World Health Organisation. Antimicrobial Resistance Global Report on surveillance.  
363 Geneva: WHO, **2014**.
- 364 5. Akova M, Daikos GL, Tzouveleakis L, Carmeli Y. Interventional strategies and current  
365 clinical experience with carbapenemase-producing Gram-negative bacteria. Clin Microbiol  
366 Infect **2012**; 18(5): 439-48.
- 367 6. Liu YY, Wang Y, Walsh TR, et al. Emergence of plasmid-mediated colistin resistance  
368 mechanism MCR-1 in animals and human beings in China: a microbiological and molecular  
369 biological study. Lancet Infect Dis **2015**.
- 370 7. Nordmann P, Poirel L. The difficult-to-control spread of carbapenemase producers among  
371 Enterobacteriaceae worldwide. Clin Microbiol Infect **2014**; 20(9): 821-30.
- 372 8. Magiorakos AP, Srinivasan A, Carey RB, et al. Multidrug-resistant, extensively drug-  
373 resistant and pandrug-resistant bacteria: an international expert proposal for interim standard  
374 definitions for acquired resistance. Clin Microbiol Infect **2012**; 18(3): 268-81.
- 375 9. Turnidge J, Gottlieb, T., Bell, J. Enterobacteriaceae Sepsis Outcome Programme (EnSOP):  
376 2013 Antimicrobial Susceptibility Report. Available at:  
377 <http://www.agargroup.org/publications>. Accessed June 2016.

- 378 10. Partridge SR, Ginn AN, Wiklendt AM, et al. Emergence of blaKPC carbapenemase genes in  
379 Australia. *Int J Antimicrob Agents* **2015**; 45(2): 130-6.
- 380 11. Wailan AM, Paterson DL, Kennedy K, Ingram PR, Bursle E, Sidjabat HE. Genomic  
381 Characteristics of NDM-Producing Enterobacteriaceae Isolates in Australia and Their  
382 blaNDM Genetic Contexts. *Antimicrob Agents Chemother* **2015**; 60(1): 136-41.
- 383 12. Chang LW, Buising KL, Jeremiah CJ, et al. Managing a nosocomial outbreak of  
384 carbapenem-resistant *Klebsiella pneumoniae*: an early Australian hospital experience. *Intern*  
385 *Med J* **2015**; 45(10): 1037-43.
- 386 13. Sidjabat HE, Townell N, Nimmo GR, et al. Dominance of IMP-4-producing enterobacter  
387 cloacae among carbapenemase-producing Enterobacteriaceae in Australia. *Antimicrob*  
388 *Agents Chemother* **2015**; 59(7): 4059-66.
- 389 14. Leung GH, Gray TJ, Cheong EY, Haertsch P, Gottlieb T. Persistence of related bla-IMP-4  
390 metallo-beta-lactamase producing Enterobacteriaceae from clinical and environmental  
391 specimens within a burns unit in Australia - a six-year retrospective study. *Antimicrob*  
392 *Resist Infect Control* **2013**; 2(1): 35.
- 393 15. Peleg AY, Franklin C, Bell JM, Spelman DW. Dissemination of the metallo-beta-lactamase  
394 gene blaIMP-4 among gram-negative pathogens in a clinical setting in Australia. *Clin Infect*  
395 *Dis* **2005**; 41(11): 1549-56.
- 396 16. Herbert S, Halvorsen DS, Leong T, Franklin C, Harrington G, Spelman D. Large outbreak  
397 of infection and colonization with gram-negative pathogens carrying the metallo- beta -  
398 lactamase gene blaIMP-4 at a 320-bed tertiary hospital in Australia. *Infect Control Hosp*  
399 *Epidemiol* **2007**; 28(1): 98-101.
- 400 17. Carter I. Metallo  $\beta$  Lactamases Gene bla<sub>imp</sub>, bla<sub>spm</sub> and bla<sub>vim</sub> Detection by Multiplex  
401 Real-Time TaqMan Assay on the Smartcycler. In: Schuller M, Sloots PT, James SG,  
402 Halliday LC, Carter WJI. *PCR for Clinical Microbiology: An Australian and International*  
403 *Perspective*. Dordrecht: Springer Netherlands, **2010**:423-7.



- 404 18. Bankevich A, Nurk S, Antipov D, et al. SPAdes: A New Genome Assembly Algorithm and  
405 Its Applications to Single-Cell Sequencing. *Journal of Computational Biology* **2012**; 19(5):  
406 455-77.
- 407 19. Gurevich A, Saveliev V, Vyahhi N, Tesler G. QUAST: quality assessment tool for genome  
408 assemblies. *Bioinformatics* **2013**; 29(8): 1072-5.
- 409 20. David M, Dzamba M, Lister D, Ilie L, Brudno M. SHRiMP2: Sensitive yet Practical Short  
410 Read Mapping. *Bioinformatics* **2011**; 27(7): 1011-2.
- 411 21. Victorian-Bioinformatics-Consortium. Neson. Available at: [https://github.com/Victorian-](https://github.com/Victorian-Bioinformatics-Consortium/neson)  
412 [Bioinformatics-Consortium/neson](https://github.com/Victorian-Bioinformatics-Consortium/neson). Accessed June 2016.
- 413 22. Stamatakis A. RAxML version 8: a tool for phylogenetic analysis and post-analysis of large  
414 phylogenies. *Bioinformatics* **2014**; 30(9): 1312-3.
- 415 23. Treangen TJ, Ondov BD, Koren S, Phillippy AM. The Harvest suite for rapid core-genome  
416 alignment and visualization of thousands of intraspecific microbial genomes. *Genome*  
417 *Biology* **2014**; 15(11): 1-15.
- 418 24. Inouye M, Dashnow H, Raven LA, et al. SRST2: Rapid genomic surveillance for public  
419 health and hospital microbiology labs. *Genome Med* **2014**; 6(11): 90.
- 420 25. Compain F, Poisson A, Le Hello S, et al. Targeting relaxase genes for classification of the  
421 predominant plasmids in Enterobacteriaceae. *Int J Med Microbiol* **2014**; 304(3-4): 236-42.
- 422 26. Zankari E, Hasman H, Cosentino S, et al. Identification of acquired antimicrobial resistance  
423 genes. *Journal of Antimicrobial Chemotherapy* **2012**; 67(11): 2640-4.
- 424 27. Gupta SK, Padmanabhan BR, Diene SM, et al. ARG-ANNOT, a new bioinformatic tool to  
425 discover antibiotic resistance genes in bacterial genomes. *Antimicrob Agents Chemother*  
426 **2014**; 58(1): 212-20.
- 427 28. Li H, Durbin R. Fast and accurate short read alignment with Burrows-Wheeler transform.  
428 *Bioinformatics* **2009**; 25(14): 1754-60.

- 429 29. European Committee on Antimicrobial Susceptibility Testing. Breakpoint tables for  
430 interpretation of MICs and zone diameters version 6.0. Available at: <http://www.eucast.org>.  
431 Accessed June 2016.
- 432 30. European Committee on Antimicrobial Susceptibility Testing. EUCAST guidelines for  
433 detection of resistance mechanisms and specific resistances of clinical and/or  
434 epidemiological importance. Available at: [http://www.eucast.org/resistance\\_mechanisms/](http://www.eucast.org/resistance_mechanisms/).  
435 Accessed June 2016.
- 436 31. Sidjabat HE, Heney C, George NM, Nimmo GR, Paterson DL. Interspecies transfer of  
437 blaIMP-4 in a patient with prolonged colonization by IMP-4-producing Enterobacteriaceae.  
438 J Clin Microbiol **2014**; 52(10): 3816-8.
- 439 32. Kanamori H, Parobek CM, Weber DJ, et al. Next-Generation Sequencing and Comparative  
440 Analysis of Sequential Outbreaks Caused by Multidrug-Resistant *Acinetobacter baumannii*  
441 at a Large Academic Burn Center. Antimicrob Agents Chemother **2015**; 60(3): 1249-57.
- 442 33. Koser CU, Holden MT, Ellington MJ, et al. Rapid whole-genome sequencing for  
443 investigation of a neonatal MRSA outbreak. N Engl J Med **2012**; 366(24): 2267-75.
- 444 34. Stoesser N, Sheppard AE, Shakya M, et al. Dynamics of MDR *Enterobacter cloacae*  
445 outbreaks in a neonatal unit in Nepal: insights using wider sampling frames and next-  
446 generation sequencing. J Antimicrob Chemother **2015**; 70(4): 1008-15.
- 447 35. Howden BP, Holt KE, Lam MM, et al. Genomic insights to control the emergence of  
448 vancomycin-resistant enterococci. MBio **2013**; 4(4).
- 449 36. Friedman ND, Pollard J, Stupart D, et al. Prevalence of *Clostridium difficile* colonization  
450 among healthcare workers. BMC Infectious Diseases **2013**; 13(1): 459.
- 451 37. Dulon M, Peters C, Schablon A, Nienhaus A. MRSA carriage among healthcare workers in  
452 non-outbreak settings in Europe and the United States: a systematic review. BMC Infectious  
453 Diseases **2014**; 14(1): 363.

- 454 38. Lubbert C, Lippmann N, Busch T, et al. Long-term carriage of *Klebsiella pneumoniae*  
455 carbapenemase-2-producing K pneumoniae after a large single-center outbreak in Germany.  
456 *Am J Infect Control* **2014**; 42(4): 376-80.
- 457 39. Quiroga MP, Andres P, Petroni A, et al. Complex Class 1 Integrons with Diverse Variable  
458 Regions, Including *aac(6')-Ib-cr*, and a Novel Allele, *qnrB10*, Associated with ISCR1 in  
459 Clinical Enterobacterial Isolates from Argentina. *Antimicrobial Agents and Chemotherapy*  
460 **2007**; 51(12): 4466-70.
- 461 40. Wang M, Tran JH, Jacoby GA, Zhang Y, Wang F, Hooper DC. Plasmid-Mediated  
462 Quinolone Resistance in Clinical Isolates of *Escherichia coli* from Shanghai, China.  
463 *Antimicrobial Agents and Chemotherapy* **2003**; 47(7): 2242-8.
- 464 41. Ho P-L, Lo W-U, Chan J, et al. *pIMP-PH114* Carrying *bla* IMP-4 in a *Klebsiella*  
465 *pneumoniae* Strain is Closely Related to Other Multidrug-Resistant IncA/C2 Plasmids.  
466 *Current Microbiology* **2014**; 68(2): 227-32.
- 467 42. Roy Chowdhury P, Ingold A, Vanegas N, et al. Dissemination of Multiple Drug Resistance  
468 Genes by Class 1 Integrons in *Klebsiella pneumoniae* Isolates from Four Countries: a  
469 Comparative Study. *Antimicrobial Agents and Chemotherapy* **2011**; 55(7): 3140-9.
- 470 43. Abraham S, O'Dea M, Trott DJ, et al. Isolation and plasmid characterization of  
471 carbapenemase (IMP-4) producing *Salmonella enterica* Typhimurium from cats. *Scientific*  
472 *Reports* **2016**; 6: 35527.
- 473 44. Morrill HJ, Pogue JM, Kaye KS, LaPlante KL. Treatment Options for Carbapenem-  
474 Resistant Enterobacteriaceae Infections. *Open Forum Infect Dis* **2015**; 2(2): ofv050.
- 475 45. Tumbarello M, Viale P, Viscoli C, et al. Predictors of mortality in bloodstream infections  
476 caused by *Klebsiella pneumoniae* carbapenemase-producing K. pneumoniae: importance of  
477 combination therapy. *Clin Infect Dis* **2012**; 55(7): 943-50.

- 478 46. Daikos GL, Tsaousi S, Tzouvelekis LS, et al. Carbapenemase-producing *Klebsiella*  
479 *pneumoniae* bloodstream infections: lowering mortality by antibiotic combination schemes  
480 and the role of carbapenems. *Antimicrob Agents Chemother* **2014**; 58(4): 2322-8.  
481  
482

483 **Table 1: Antibiotic Resistance Profile as determined by Etest, Vitek2 and ResFinder**

| Patient                      |                      |                             | 1      |        | 2      |        |        |        | 3      |        |          |        |     |
|------------------------------|----------------------|-----------------------------|--------|--------|--------|--------|--------|--------|--------|--------|----------|--------|-----|
| Strain                       |                      |                             | 7884   | 7885   | 7886   | 7887   | 7888   | 7889   | 7890   | 7891   | 7892     | 7893   |     |
| Source                       |                      |                             | ETT    | urine  | ETT    | urine  | blood  | urine  | ETT    | blood  | Leg swab | blood  |     |
| ST                           |                      |                             | 90     | 90     | 90     | 90     | 90     | 90     | 90     | 90     | 90       | 90     |     |
| Plasmid                      |                      |                             | IncHI2 | IncHI2 | IncHI2 | IncHI2 | IncHI2 | IncHI2 | IncHI2 | IncHI2 | IncHI2   | IncHI2 |     |
| MIC(mg/L) by E-test          |                      | Ertapenem                   | 1      | 2      | 4      | 2      | 0.5    | 0.032  | 2      | 0.5    | 0.5      | 2      |     |
|                              |                      | Imipenem                    | 2      | 1      | 4      | 8      | 1      | 0.5    | 2      | 1      | 1        | 4      |     |
|                              |                      | Meropenem                   | 0.5    | 1      | 4      | 2      | 0.5    | 0.032  | 2      | 1      | 0.5      | 0.5    |     |
|                              |                      |                             |        |        |        |        |        |        |        |        |          |        |     |
| β-lactams and Cephalosporins | Vite k2 <sup>1</sup> | Tim                         | ≥128   | ≥128   | ≥128   | ≥128   | ≥128   | 32     | ≥128   | ≥128   | ≥128     | ≥128   |     |
|                              |                      | Mer                         | ≥16    | ≥16    | ≥16    | ≥16    | ≥16    | ≤0.25  | ≥16    | ≥16    | ≥16      | ≥16    |     |
|                              |                      | Taz                         | 16     | 16     | 16     | 16     | 16     | 8      | 16     | 16     | 16       | 16     |     |
|                              |                      | Fox                         | ≥64    | ≥64    | ≥64    | ≥64    | ≥64    | ≥64    | ≥64    | ≥64    | ≥64      | ≥64    |     |
|                              |                      | Caz                         | ≥64    | ≥64    | ≥64    | ≥64    | ≥64    | ≤1     | ≥64    | ≥64    | ≥64      | ≥64    |     |
|                              |                      | Cro                         | 16     | 16     | 16     | 16     | 16     | ≤1     | 16     | 16     | 16       | 8      |     |
|                              |                      | Fep                         | 2      | 2      | 4      | 2      | 2      | ≤1     | 2      | 2      | 2        | 4      |     |
|                              | Res                  | <i>ampC</i>                 | +      | +      | +      | +      | +      | +      | +      | +      | +        | +      |     |
|                              |                      | <i>bla<sub>OXA-1</sub></i>  | +      | +      | +      | +      | +      | -      | +      | +      | +        | +      |     |
|                              |                      | <i>bla<sub>IMP-4</sub></i>  | +      | +      | +      | +      | +      | -      | +      | +      | +        | +      |     |
|                              |                      | <i>bla<sub>TEM-1B</sub></i> | +      | +      | +      | +      | +      | +      | +      | +      | +        | +      |     |
|                              | Aminoglycosides      | Vite k2                     | Ami    | ≤2     | ≤2     | ≤2     | ≤2     | ≤2     | 8      | ≤2     | ≤2       | ≤2     | ≤2  |
|                              |                      |                             | Gent   | ≥16    | ≥16    | ≥16    | ≥16    | ≥16    | ≤1     | ≥16    | ≥16      | ≥16    | ≥16 |
| Tob                          |                      |                             | 8      | 8      | 8      | 8      | 8      | ≥16    | 8      | 8      | 8        | 8      |     |
| Res                          |                      | <i>strB</i>                 | +      | +      | +      | +      | +      | +      | +      | +      | +        | +      |     |
|                              |                      | <i>strA</i>                 | +      | +      | +      | +      | +      | +      | +      | +      | +        | +      |     |
|                              |                      | <i>aac(6')Ib-cr</i>         | +      | +      | +      | +      | +      | +      | +      | +      | +        | +      |     |
|                              |                      | <i>aac(3)-IIId</i>          | +      | +      | +      | +      | +      | -      | +      | +      | +        | +      |     |
| Quinolones                   | Vite k2              | Cip                         | ≤0.25  | 0.5    | ≤0.25  | ≤0.25  | 0.5    | ≤0.25  | 0.5    | 0.5    | 1        | ≤0.25  |     |
|                              |                      | Nor                         | 2      | 2      | 2      | 2      | 2      | 0.5    | 2      | 2      | 2        | 1      |     |
|                              | Res                  | <i>qnrB2</i>                | +      | +      | +      | +      | +      | -      | +      | +      | +        | +      |     |
| Sulphonamide/ Trimethoprim   | Vite k2              | Tmp/smx                     | ≥320   | ≥320   | ≥320   | ≥320   | ≥320   | ≥320   | ≥320   | ≥320   | ≥320     | ≥320   |     |
|                              |                      | <i>sull</i>                 | +      | +      | +      | +      | +      | +      | +      | +      | +        | +      |     |
|                              | Res                  | <i>dfrA18</i>               | +      | +      | +      | +      | +      | +      | +      | +      | +        | +      |     |
| Rifampicin                   | Res                  | <i>arr3</i>                 | +      | +      | +      | +      | +      | -      | +      | +      | +        | +      |     |
| Macrolide                    | Res                  | <i>mph(A)</i>               | +      | +      | +      | +      | +      | -      | +      | +      | +        | +      |     |
| Phenicol                     | Res                  | <i>catA2</i>                | +      | +      | +      | +      | +      | +      | +      | +      | +        | +      |     |
|                              |                      | <i>catB3</i>                | +      | +      | +      | +      | +      | +      | +      | +      | +        | +      |     |
| Tetracycline                 | Res                  | <i>tet(D)</i>               | +      | +      | +      | +      | +      | +      | +      | +      | +        | +      |     |

484  
485 <sup>1</sup>Res = ResFinder Antimicrobial Resistance gene database; Vitek = Vitek2 automated susceptibility  
486 MIC (mg/L): Tim=ticarcillin-clavulanate, Taz=piperacillin-tazobactam, Fox=cefoxitin,  
487 Caz=ceftazidime, Cro=ceftriaxone, Fep=cefepime, Mer=meropenem, Ami=amikacin,  
488 Gent=gentamicin, Tob=tobramycin, Cip=ciprofloxacin, Nor=norfloxacin, Tmp/smx=trimethoprim-  
489 sulphamethoxazole

## 490 **Figure Legends:**

491 **Figure 1: RBWH clinical case study outline:** Three burns patients were admitted to the RBWH  
 492 ICU ward in mid 2015. Patient 1 (Female, 43-years-old) and Patient 2 (Female, 58-years-old) were  
 493 admitted on the same day. Subsequent to admission, both patients developed carbapenem-resistant  
 494 *E. cloacae* infections, with two samples taken from patient 1 (source = ETT [purple] and urine  
 495 [grey]), and 4 samples taken from patient 2 (source = ETT [purple], urine [grey], and blood [red]).  
 496 Patient 3 (Female, 39-years-old) was admitted 37 days after the patient 1 and 2 had been admitted  
 497 and after they had been discharged from the ICU. Patient 3 also developed infection due to a  
 498 carbapenem-resistant *E. cloacae* infection, and had 4 samples taken from ETT (purple), blood (red)  
 499 and wound sites (orange). After intensive antibiotic and antifungal treatment, the patient was  
 500 palliated on day 47 of ICU admission. Sequencing and genomics analysis of all 10 isolates was  
 501 undertaken following confirmation of all three patients being infected with *bla*<sub>IMP-4</sub>-producing *E.*  
 502 *cloacae* (period shown in purple shading). Environmental swabbing was undertaken 65 days after  
 503 the initial admission of patient 1 and 2, and 29 days after the admission of patient 3 (orange square).

505 **Figure 2: CRE isolate timeline and relationship matrix: A.** 10 isolates were collected from 3  
 506 patients at various time-points in mid 2015. Coloured blocks indicate the source of the isolated  
 507 strain: purple: respiratory, grey: urine, red: blood, and orange: wound. **B.** Relationship matrix (left)  
 508 shows specific core single nucleotide variant (SNV) differences identified between strains. Strains  
 509 within the same circle have identical core SNV profiles. Lines connecting circles represent  
 510 accumulating SNV differences between strains (not-to-scale), where each line represents one SNV  
 511 (including nucleotide deletion). Specific nucleotide differences between isolates are given in the  
 512 table in panel B. Locations and consequences of nucleotide change are shown in Supplementary  
 513 Dataset S1. All 11 isolates differed by 5 SNVs overall.

514

**Figure 3: Core SNP Maximum likelihood (ML) tree of Hospital A and B *E. cloacae* isolates in relation to RBWH isolates:** Trimmed reads from 6 *E. cloacae* isolates (Hospital A and B) were aligned to the reference *E. cloacae* Ec11 (isolated in 2013 at the RBWH) to determine core single nucleotide polymorphisms (SNPs) between all isolates. Ec11 in this figure represents all 2015 RBWH isolates (n=10) as they were found to be near identical at the core genome level. 63,861 core SNPs were identified and used to generate a ML tree with RAxML (1000 bootstrap replicates), which determined no relationship between the RBWH isolates (pink) and the Hospital B (blue)/Hospital A (orange) isolates. Four closely related strains were identified from Hospitals A and B (red box). Alignment of trimmed reads from MS8077, MS8079 and MS7926 to MS7924 identified 117 core SNPs, however, a number of these SNPs were removed as they were identified as residing within transposon or phage regions. The remaining 58 core SNPs were used to generate a ML tree (1000 bootstrap replicates), showing that Hospital B strains differ by less than 20 SNPs.

**Figure 4: Large IncHI2 plasmid with ~55 kb multidrug resistance region containing IMP-4 carbapenemase: A.** A 330,060 bp IncHI2 plasmid carrying multiple resistance operons, including a large ~55 kb multidrug resistance (MDR) region, was fully recovered and assembled using Pacific Biosciences (PacBio) SMRT sequencing of strain MS7884 (patient 1, isolate 1). The multidrug resistance region was found to contain two class 1 integrons (In809, In37) along with several other antibiotic resistance genes, as indicated. Comparison of this MDR region to publicly available genomes found a close match to pEl1573, isolated in 2012 from an *E. cloacae* isolate in Sydney, Australia. **B.** A predicted model of homologous recombination between two *aac(6')-Ib* (*aac6*) genes (red asterisks) within the ~55 kb MDR region in MS7889 (patient 2, isolate 4, IMP-, carbapenem-susceptible) leading to the loss of a ~34 kb region containing *bla<sub>IMP-4</sub>* as well as several other antibiotic resistance genes.

540 **Figure 1**

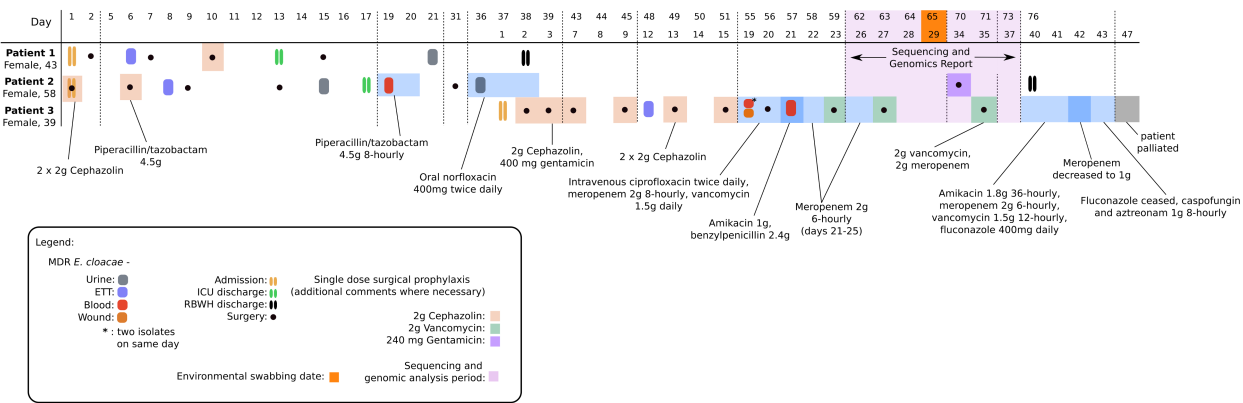



543 **Figure 2**

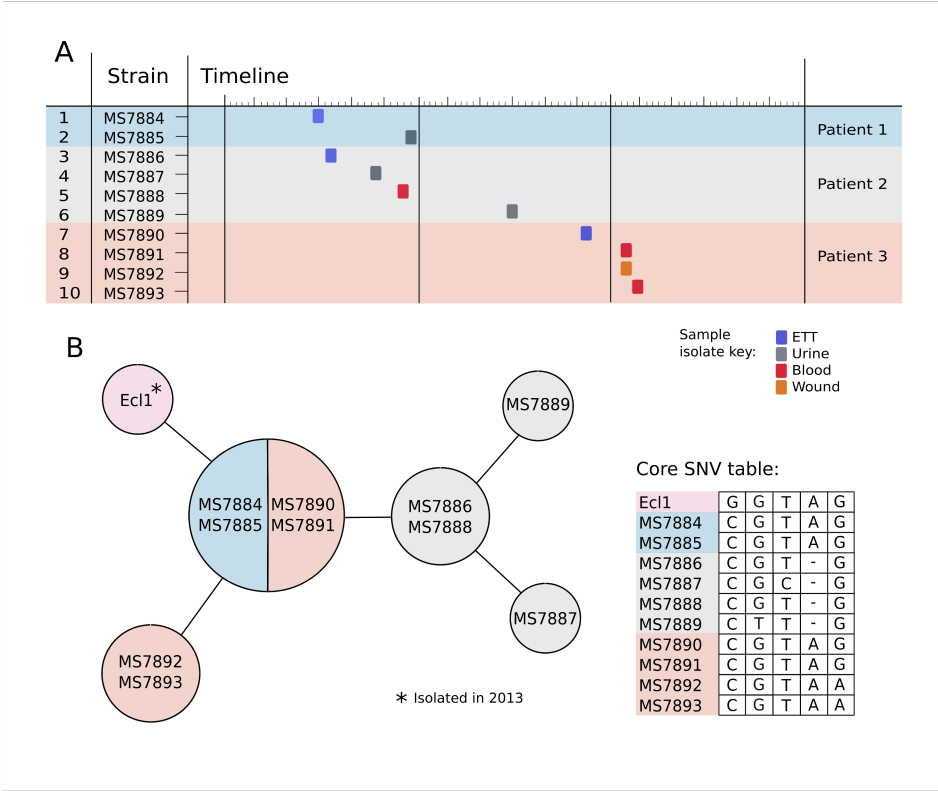

544  
545

546 **Figure 3**

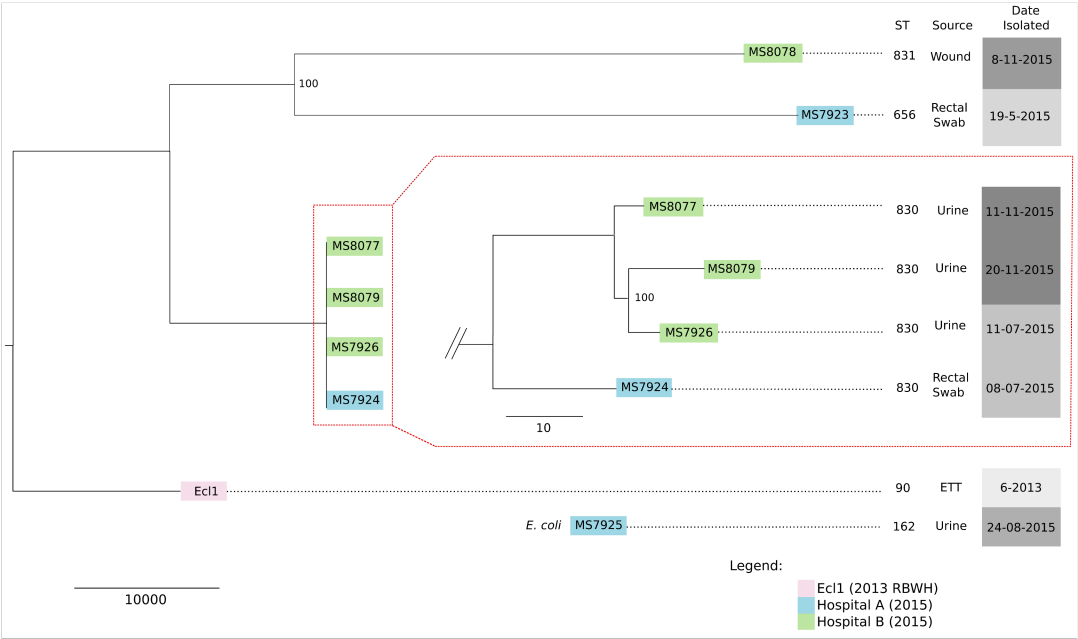

549 **Figure 4**

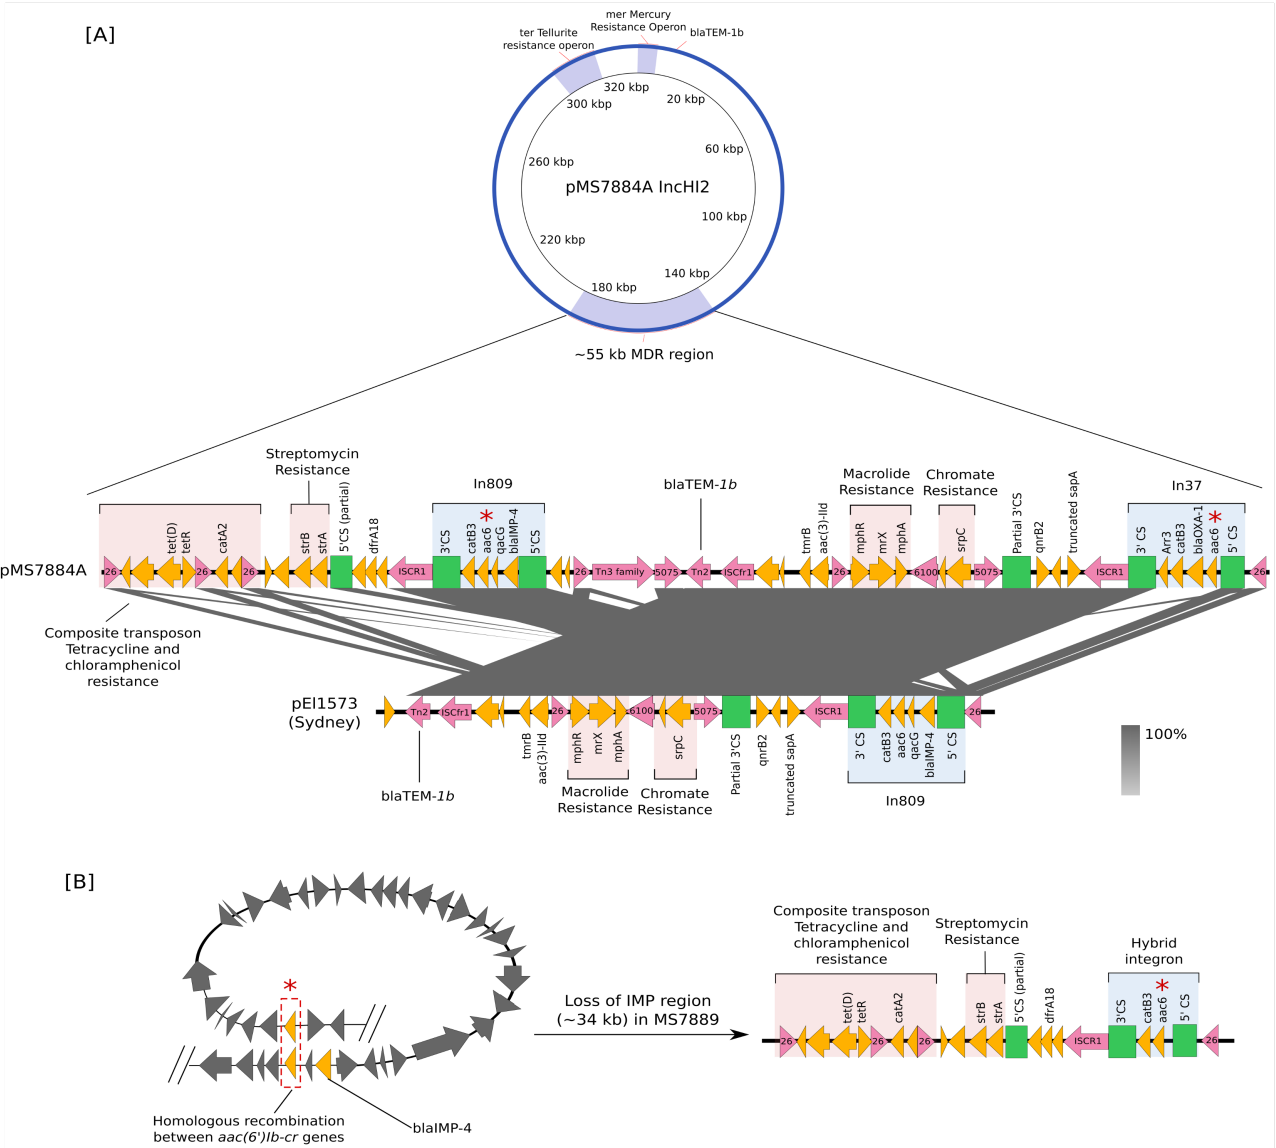

550
