# Integrating multiple genomic technologies to investigate an outbreak of carbapenemase-producing *Enterobacter hormaechei*

Leah W. Roberts<sup>1,2,3</sup>, Patrick N. A. Harris<sup>4,5</sup>, Brian M. Forde<sup>1,2,3</sup>, Nouri L. Ben Zakour<sup>1,2,3</sup>,  
Mitchell Stanton-Cook<sup>1,2</sup>, Elizabeth Catchpoole<sup>5</sup>, Minh-Duy Phan<sup>1,2</sup>, Hanna E. Sidjabat<sup>4</sup>, Haakon  
Bergh<sup>5</sup>, Claire Heney<sup>5</sup>, Jayde A. Gawthorne<sup>1,2</sup>, Jeffrey Lipman<sup>4,6</sup>, Anthony Allworth<sup>7</sup>, Kok-Gan  
Chan<sup>8,9</sup>, Teik Min Chong<sup>8</sup>, Wai-Fong Yin<sup>8</sup>, Mark A. Schembri<sup>1,2</sup>, David L. Paterson<sup>2,4,10</sup>, Scott A.  
Beatson<sup>1,2,3</sup>

1. School of Chemistry and Molecular Biosciences, The University of Queensland, Brisbane, QLD, Australia
2. Australian Infectious Diseases Research Centre, The University of Queensland, Brisbane, QLD, Australia
3. Australian Centre for Ecogenomics, The University of Queensland, Brisbane, QLD, Australia
4. The University of Queensland, UQ Centre for Clinical Research, Brisbane, QLD, Australia
5. Pathology Queensland, Central Microbiology, Brisbane, QLD, Australia
6. Burns Trauma and Critical Care Research Centre, The University of Queensland, Brisbane, QLD, Australia
7. Infectious Disease Unit, Royal Brisbane & Women's Hospital, Brisbane, QLD, Australia
8. Division of Genetics and Molecular Biology, Institute of Biological Sciences, Faculty of Science, University of Malaya, Kuala Lumpur, Malaysia
9. International Genome Centre, Jiangsu University, Zhenjiang, China.
10. Wesley Medical Research, The Wesley Hospital, Auchenflower, QLD, Australia

26 **Key words:** *bla*<sub>IMP-4</sub>; carbapenem resistant, whole genome sequencing; plasmid; carbapenemase-  
27 producing Enterobacteriaceae (CPE)

28  
29 **Corresponding author:**

30 Associate Professor Scott A. Beatson, School of Chemistry and Molecular Biosciences, The  
31 University of Queensland, Brisbane 4072, QLD, Australia

32 Telephone +61-7-33654863

33 Email [s.beatson@uq.edu.au](mailto:s.beatson@uq.edu.au)

34  
35 **Alternative corresponding author:**

36 Dr Patrick N. A. Harris, UQ Centre for Clinical Research, The University of Queensland, Brisbane,  
37 QLD, Australia

38 Telephone +61 7 3346 5555

39 Email [p.harris@uq.edu.au](mailto:p.harris@uq.edu.au)

40

## 41 **Abstract**

42 Carbapenem-resistant Enterobacteriaceae (CRE) represent one of the most urgent threats to human  
43 health posed by antibiotic resistant bacteria. *Enterobacter hormaechei* and other members of the  
44 *Enterobacter cloacae* complex are the most commonly encountered *Enterobacter* spp. within  
45 clinical settings, responsible for numerous outbreaks and ultimately poorer patient outcomes. Here  
46 we applied three complementary whole genome sequencing (WGS) technologies to characterise a  
47 hospital cluster of *bla*<sub>IMP-4</sub> carbapenemase-producing *E. hormaechei*.

48 In response to a suspected CRE outbreak in 2015 within an Intensive Care Unit (ICU)/Burns Unit in  
49 a Brisbane tertiary referral hospital we used Illumina sequencing to determine that all outbreak  
50 isolates were sequence type (ST)90 and near-identical at the core genome level. Comparison to  
51 publicly available data unequivocally linked all 10 isolates to a 2013 isolate from the same ward,  
52 confirming the hospital environment as the most likely original source of infection in the 2015  
53 cases. No clonal relationship was found to IMP-4-producing isolates identified from other local  
54 hospitals. However, using Pacific Biosciences long-read sequencing we were able to resolve the  
55 complete context of the *bla*<sub>IMP-4</sub> gene, which was found to be on a large IncHI2 plasmid carried by  
56 all IMP-4-producing isolates. Continued surveillance of the hospital environment was carried out  
57 using Oxford Nanopore long-read sequencing, which was able to rapidly resolve the true  
58 relationship of subsequent isolates to the initial outbreak. Shotgun metagenomic sequencing of  
59 environmental samples also found evidence of ST90 *E. hormaechei* and the IncHI2 plasmid within  
60 the hospital plumbing.

61 Overall, our strategic application of three WGS technologies provided an in-depth analysis of the  
62 outbreak, including the transmission dynamics of a carbapenemase-producing *E. hormaechei*  
63 cluster, identification of possible hospital reservoirs and the full context of *bla*<sub>IMP-4</sub> on a multidrug  
64 resistant IncHI2 plasmid that appears to be widely distributed in Australia.

## 65 **Introduction:**

66 Carbapenem antibiotics have become the mainstay of therapy for serious infections caused by  
67 multidrug resistant (MDR) Gram-negative bacteria, especially for strains expressing extended-  
68 spectrum  $\beta$ -lactamase (ESBL) or AmpC-type enzymes<sup>1</sup>. Increased use has driven resistance to  
69 carbapenems and the emergence of carbapenemase-producing Enterobacteriaceae (CPE) and  
70 carbapenem-resistant Enterobacteriaceae (CRE), which include common enteric species such as  
71 *Escherichia coli*, *Klebsiella pneumoniae* and *Enterobacter* spp.<sup>2</sup>.

72  
73 Before 2005, an estimated 99.9% of Enterobacteriaceae were susceptible to carbapenems<sup>3</sup>.  
74 However, the isolation of CRE has since increased dramatically and these organisms are now  
75 reported in all WHO health regions<sup>4</sup>. The mortality rates for CRE infections are reported to be as  
76 high as 48%<sup>5</sup>, and resistance to last-line antibiotics used in lieu of carbapenems, such as colistin,  
77 has also emerged<sup>6</sup>.

78  
79 Resistance to carbapenems in Enterobacteriaceae occurs via a range of mechanisms. Of greatest  
80 concern is the acquisition of genes encoding carbapenemases<sup>7</sup>. This most frequently occurs via  
81 transfer of mobile genetic elements (MGE), such as plasmids, occasionally carrying multiple  $\beta$ -  
82 lactamases co-located with other resistance determinants, rendering these strains MDR or  
83 extensively drug-resistant (XDR)<sup>8</sup>. Australia has experienced low rates of CRE<sup>9</sup>, although sporadic  
84 introduction of *K. pneumoniae* carbapenemase (KPC)<sup>10</sup> and New Delhi metallo- $\beta$ -lactamase (NDM)  
85 <sup>11</sup> has been reported, including significant nosocomial outbreaks<sup>12</sup>. The most frequently encountered  
86 carbapenemase in Australia is *bla*<sub>IMP-4</sub>, particularly in *Enterobacter* spp.<sup>13</sup>. IMP-producing  
87 *Enterobacter* spp. have caused occasional outbreaks within intensive care or burns units in  
88 Australian hospitals<sup>14-16</sup>.

89

Here, we describe the use of whole genome sequencing (WGS) to investigate an outbreak of IMP-4-producing *Enterobacter hormaechei* within an Intensive Care Unit (ICU) and Burns facility.

# **Clinical case report**

Two patients in mid 2015 were transferred from regional Queensland hospitals to the ICU with burn injuries sustained from the same accident (Figure 1). *E. cloacae* complex was cultured from the endotracheal tube (ETT) of patients 1 and 2 on day 6 and 8 of admission, respectively. Both *E. cloacae* complex isolates were confirmed as MDR by phenotypic testing used in the diagnostic setting (Table 1). Real-time PCR amplification of *bla*<sub>IMP-4</sub> confirmed their status as carbapenemase-producers. Both of these patients were previously well, with no prior hospital admission or contact with healthcare facilities. Neither had been resident or hospitalized overseas for more than 20 years.

Patient 1 underwent debridement and split skin grafting for 29% total body surface area burns on day 2 of ICU admission and subsequently had 3 procedures in the burns operating rooms (Figure 1). An additional MDR-*E. cloacae* complex isolate was isolated from urine on day 21, eight days after discharge from the ICU. After no further colonisation of MDR-*E. cloacae* complex, Patient 1 was discharged from the hospital on day 38.

Patient 2 underwent multiple grafting and debridement procedures and was discharged from the ICU on day 17 (Figure 1). MDR-*E. cloacae* complex colonisation from the ETT and from urine was noted on day 8 and day 15, respectively. By day 19, the patient developed clinical signs of sepsis, with a phenotypically identical isolate identified in blood cultures and from a central venous line (CVL) tip culture. She received piperacillin/tazobactam 4.5 grams 8-hourly for 2 days, improved following line removal and did not receive further antibiotics for this episode. A subsequent *E. cloacae* complex was isolated from urine collected from a urinary catheter 17 days later demonstrated a different antibiogram with susceptibility to third generation cephalosporins,

meropenem and gentamicin. She received 3 days of oral norfloxacin 400mg twice daily with microbiological resolution.

Patient 3, a 39-year old woman, was admitted with 66% total body surface area burns to the same ICU 5 weeks after Patient 1 and 2 were admitted and 20 days after they had been discharged from the ICU (Figure 1). MDR-*E. cloacae* complex was cultured from the ETT of Patient 3 on day 12 of ICU admission. She had frequent brief admissions to several hospitals since 2010 (never to ICU), and no MDR Gram-negative bacilli were identified in clinical or screening samples during previous admissions. MDR-*E. cloacae* complex with *Pseudomonas aeruginosa* were isolated from 8 skin swabs and an additional ETT aspirate. On days 19 and day 21, MDR-*E. cloacae* complex was isolated from blood cultures in the context of skin graft breakdown and signs of systemic inflammatory response syndrome (SIRS) with increasing inotrope requirements (Figure 1). *Streptococcus mitis* was cultured from blood on day 19. On day 36, her condition worsened with signs of SIRS. Transesophageal echocardiography demonstrated aortic and mitral valve lesions consistent with endocarditis. Pancytopenia developed, with a bone marrow aspirate and trephine suggestive of peripheral consumption. Multiple suspected cerebral, pulmonary, splenic and renal septic emboli were identified on imaging. She was palliated on day 47 of admission due to extensive cerebral emboli (Figure 1).

## **Materials & Methods**

### **Study setting**

Primary isolates were obtained from patients admitted to the Royal Brisbane & Women's Hospital (RBWH), a tertiary referral hospital with 929 beds in South-East Queensland, Australia. Additional IMP-producing isolates, cultured from patients admitted to other hospitals in the metropolitan Brisbane area (referred to as Hospital A and B), were obtained from Pathology Queensland - Central Microbiology for comparison (Table S4).

## 142

### 143 **Antimicrobial susceptibility testing and carbapenemase detection**

144 All bacterial isolates were identified by matrix-assisted laser desorption/ionization mass  
 145 spectrometry (MALDI-TOF) (Vitek MS; bioMérieux, France). Antimicrobial susceptibility testing  
 146 was carried out using Vitek 2 automated AST-N426 card (bioMérieux) with Etest to determine  
 147 MICs for meropenem, imipenem and ertapenem. Carbapenemase activity was assessed by the use  
 148 of the Carba-NP test (RAPIDEC; bioMérieux) and the presence of the *bla*<sub>IMP-4-like</sub> carbapenemase  
 149 gene confirmed using an in-house multiplex real-time PCR (also targeting NDM, KPC, VIM and  
 150 OXA-48-like carbapenemases)<sup>17</sup>.

### 152 **Bacterial DNA extraction**

153 Single colonies were selected from primary bacterial cultures and grown in 10 mL Luria Bertani  
 154 (LB) broth at 37°C overnight (shaking 250 rpm). DNA was extracted using the UltraClean®  
 155 Microbial DNA Isolation Kit (MO BIO Laboratories) as per manufacturer instructions.

### 157 **Genome sequencing, Quality Control and *de novo* Assembly**

158 All isolates in this study were sequenced using Illumina (see supplementary appendix). Reads  
 159 passing quality control (QC) were assembled using Spades v3.6.0<sup>18</sup> under default parameters  
 160 (without careful flag). Contigs with coverage less than 10x were removed from final assemblies.  
 161 Final assembly metrics were checked using QUAST v2.3<sup>19</sup> (Table S3). A single isolate (MS14449)  
 162 was sequenced using Nanopore MinION sequencing (see supplementary appendix).

### 164 **Taxonomic identification**

165 Illumina raw reads were analysed using Kraken v0.10.5-beta to determine species and possible  
 166 contamination. With the exception of MS7925, which was found to be *E. coli*, initial analysis  
 167 determined the isolates to be *E. cloacae*. Subsequent analysis of the *E. cloacae de novo* assemblies

168 using MASH v2.0<sup>20</sup> and FastANI v1.1<sup>21</sup> against representative *E. cloacae* complex complete  
169 genomes (see supplementary material) determined all isolates to be *E. hormaechei*.

170

## 171 **Phylogenetic analysis**

172 SHRiMP v2.2.3<sup>22</sup> as implemented in Nesoni v0.130<sup>23</sup> under default settings was used to determine  
173 core single nucleotide polymorphisms (SNPs) between the ten 2015 RBWH *E. hormaechei* genomes  
174 to the reference Ec11 and create a minimal-spanning tree. Further details of the Ec11 assembly and  
175 SNP-calling process are provided in the supplementary appendix. Maximum likelihood trees of Ec11  
176 and the 6 *E. cloacae* from Hospitals A and B were built using RAxML v8.1.15<sup>24</sup> based on the Nesoni  
177 core SNPs. RAxML was run with the GTRGAMMA nucleotide substitution rate and an initial seed  
178 length of 456 (bootstrap 1000 with Lewis ascertainment correction). Core genome size was estimated  
179 using Parsnp v1.2<sup>25</sup>.

180

## 181 **Multi-locus Sequence Typing (MLST), Plasmid Typing and Antimicrobial Resistance (AMR)**

### 182 **Gene Profiling**

183 MLST of isolate raw reads was performed using srst2 v0.1.5<sup>26</sup> with typing schemes available on  
184 PubMLST (<http://pubmlst.org/>). Plasmid replicon typing was done based on Compain *et al.*<sup>27</sup>.  
185 Antibiotic resistance genes were detected using the ResFinder database<sup>28</sup> and the ARG-ANNOT  
186 database<sup>29</sup> with BLASTn and srst2<sup>26</sup> respectively. Manual confirmation was carried out using  
187 BLASTn and read mapping using Burrows-Wheeler Aligner (BWA v0.7.5a-r405)<sup>30</sup>. Further details  
188 of whole genome comparisons and phage analysis are given in the supplementary appendix.

189

## 190 **Pacific Biosciences (PacBio) Single Molecule Real-Time (SMRT) Sequencing**

191 A representative *E. hormaechei* isolate from patient 1 (MS7884) was grown on LB agar at 37°C  
192 overnight. IMP positive colonies (determined by colony PCR) were grown overnight in 15 mL LB  
193 broth with 2 µg/mL meropenem to avoid plasmid loss. Genomic DNA was extracted using



194 UltraClean® Microbial DNA Isolation Kit (MO BIO) as per manufacturer's instructions. 18.7 µg of  
195 DNA was prepared for sequencing using an 8-12 kb insert library and sequenced on a PacBio RSII  
196 sequencer using 1 SMRT cell. Further details of the assembly, annotation methods and plasmid  
197 stability in MS7884 are given in the supplementary appendix.

## 198

## 199 **Metagenomic sequencing and analysis of environmental samples**

200 Swab and water samples from the ICU and Burns Ward were collected July 2018. DNA was  
201 extracted directly from samples using the Qiagen DNeasy Powersoil extraction kit including  
202 Biospec Products 0.1 mm diameter glass beads (as per manufacturers instructions). Water samples  
203 were concentrated using a Whatman Nuclepore 0.2 µm polycarbonate 25 mm diameter filter prior  
204 to DNA extraction. Sample DNA was sequenced at the Australian Centre for Ecogenomics on an  
205 Illumina NextSeq 500 (see supplementary appendix).

206 All samples were screened for species using Kraken v1.0<sup>31</sup>. Samples were also screen for resistance  
207 genes using srst2 v0.2.0<sup>26</sup> against the ARG-ANNOT database. MinHash sketches of the ST90 *E.*  
208 *hormaechei* chromosome MS7884 (GenBank: CP022532.1) and the associated IncHI2 plasmid  
209 pMS7884A (GenBank: CP022533.1) were generated using MASH v1.1.1<sup>20</sup> at default settings.  
210 Illumina reads for each sample were screened against our reference sketches using the screen  
211 function in MASH. Samples that shared >=90% of hashes were mapped to the reference sequences.  
212 Mapped reads were then parsed using a custom script and *de novo* assembled using Spades v3.11.1  
213 for MLST analysis using Abricate v0.8 (<https://github.com/tseemann/abricate>) and nucleotide  
214 comparison using ACT<sup>32</sup> and BRIG<sup>33</sup>.

## 215

## 216 **Accession numbers**

217 Genome data has been deposited under Bioproject PRJNA383436. Illumina raw  
218 reads (SRX2999336-SRX2999345, SRX5578807-SRX5578812, SRX5578814), Nanopore raw  
219 reads (SRX5578813), PacBio raw reads (SRX2999346-SRX2999347) and metagenomic reads

(SRX5590605-SRX5590610) have been deposited in the Sequence Read Archive (SRA). The MS7884 chromosome (CP022532), pMS7884A plasmid (CP022533), and pMS7884B plasmid (CP022534) have been deposited in GenBank.

223

## 224 **Results**

### 225 **All three patients carry carbapenemase-producing *E. cloacae* complex**

226 With the exception of MS7889 (isolated from the urine of Patient 2 on day 36), all *E. cloacae*  
227 complex isolates collected from the outbreak were resistant to ceftriaxone, ceftazidime, ticarcillin-  
228 clavulanate, piperacillin-tazobactam, meropenem, gentamicin and trimethoprim-sulphamethoxazole  
229 by Vitek 2 testing (Table 1) and demonstrated carbapenemase production by Carba-NP. The MICs  
230 for meropenem were considerably lower when tested by Etest<sup>34</sup>, often falling below the clinically  
231 susceptible breakpoint defined by EUCAST, but above the epidemiological cut-off (ECOFF)<sup>35</sup>.  
232 MS7889 was fully susceptible to carbapenems (meropenem MIC=0.032 by Etest) and was negative  
233 for IMP-4-like genes by PCR (Table 1).

234

### 235 **Whole genome sequencing identifies a link to a previous IMP-producing isolate**

236 WGS of 10 isolates from patients 1, 2 and 3 was initiated after an additional microbiological  
237 confirmation of a *bla*<sub>IMP-4</sub> *E. cloacae* complex isolate from a third patient from the RBWH ICU  
238 (Figure 1). *In silico* analysis determined all to be sequence type (ST)90 *E. hormaechei* (part of the  
239 *E. cloacae* complex), with the majority exhibiting the same resistance gene profile, including a  
240 100% identical *bla*<sub>IMP-4</sub> gene (Table 1). The exception was the carbapenem susceptible isolate  
241 MS7889, which was confirmed by WGS to have lost the *bla*<sub>IMP-4</sub> gene as well as several additional  
242 resistance genes conserved in the other *E. hormaechei* isolates (Table 1). All ten isolates contained  
243 an IncHI2 plasmid. Sequence analysis suggested that AmpC derepression was unlikely to contribute  
244 to carbapenemase activity in these strains (further details are given in the supplementary appendix).

245

246 Comparison of the *E. hormaechei* genomes to publicly available draft assemblies identified a close  
247 match to *E. hormaechei* Ec11 (GenBank: JRFQ01000000; formerly *E. cloacae*), an ST90 strain  
248 isolated from a burns patient at the RBWH ICU almost two years prior to the 2015 outbreak<sup>13,36</sup>.  
249 Antibiotic resistance profiling of the Ec11 genome revealed an identical resistance profile compared  
250 to the majority of the 2015 isolates (Table 1).

251

252 **The 2015 outbreak isolates were near identical at the core genome level to an isolate from**  
253 **2013**

254 To investigate the relationship between the isolates at single-nucleotide resolution, reads from the  
255 2015 RBWH isolates were mapped to *E. hormaechei* draft assembly for Ec11. All 2015 RBWH  
256 isolates differed by fewer than five core SNPs (4,934,357 bp core genome), consistent with a direct  
257 ancestral relationship (Figure 2). Two isolates from Patient 1 and two isolates from Patient 3 were  
258 indistinguishable at the core genome level (Figure 2), although all of the isolates from Patient 3 had  
259 lost a prophage region (refer supplementary appendix). Ec11 (isolated in 2013) was very closely  
260 related to these isolates, differing by only one core SNP. All four isolates from Patient 2 contained a  
261 discriminatory single-nucleotide deletion, thereby ruling out Patient 2 to Patient 3 transmission  
262 (Figure 2).

263

264 **Integration of WGS with infection control response**

265 WGS analysis unequivocally linked all 10 isolates to the 2013 isolate Ec11 from the same ward,  
266 confirming that the clone had not been an incursion from the accident affecting Patient 1 and 2 and  
267 that the hospital environment was suspected as the most likely original source of infection in the  
268 2015 cases. In response, 28 environmental samples from the ICU, burns wards and operating  
269 theatres were collected 65 days after patient 1 and 2 were admitted and inoculated onto MacConkey  
270 agar with 8 mg/mL gentamicin (laboratory standard screening medium for MDR Gram-negative  
271 bacilli). No carbapenemase-producing *Enterobacter* spp. were detected. Additionally, no

272 carbapenemase-producing *Enterobacter* spp. were detected in patients admitted to the ICU or burns  
273 unit for a 6-month period following the outbreak.

274

## 275 **Sequencing of additional CPE isolates identify a circulating IMP-4-carrying plasmid in** 276 **Queensland**

277 To determine the broader context of IMP-producing Enterobacteriaceae in surrounding hospitals,  
278 seven additional *bla*<sub>IMP-4</sub> producing Enterobacteriaceae (*E. cloacae* complex n=6, *E. coli* n=1) were  
279 sequenced. These represented a selection of *bla*<sub>IMP-4</sub> producing Enterobacteriaceae identified from  
280 Brisbane public hospitals via Pathology Queensland Central Microbiology for 2015. Both MLST  
281 and SNP analysis found no relationship to the 2015 RBWH *E. hormaechei*, with approximately  
282 50,000 SNP differences between the ST90 representative strain Ec11 and its nearest non-ST90  
283 phylogenetic neighbour (Figure 3, also see supplementary appendix). Despite not being clonally  
284 related, all additional Enterobacteriaceae isolates possessed very similar antibiotic resistance gene  
285 profiles (Table S4), suggesting the possibility of lateral gene transfer via mobile genetic elements  
286 (e.g. integrons and/or plasmids). WGS analysis revealed that all 18 CPE isolates in this study,  
287 including the *E. coli* isolate, harbored an IncHI2 plasmid (plasmid ST1) and an identical *bla*<sub>IMP-4</sub>  
288 gene, strongly suggesting plasmid-mediated circulation of *bla*<sub>IMP-4</sub> between Enterobacteriaceae in  
289 Brisbane hospitals.

290

## 291 ***bla*<sub>IMP-4</sub> resides in the class 1 integron In809 on an IncHI2 plasmid**

292 Due to the presence of multiple repetitive elements surrounding *bla*<sub>IMP-4</sub>, including insertion  
293 sequences (IS) and two suspected integrons with similar gene content, we were unable to accurately  
294 resolve the context of *bla*<sub>IMP-4</sub> using Illumina sequencing alone. One representative isolate  
295 (MS7884) was sequenced twice using PacBio SMRT sequencing, which was able to resolve a  
296 complete closed chromosome of 4,810,853 bp and two plasmids: pMS7884A, a 330,060 bp IncHI2  
297 plasmid carrying *bla*<sub>IMP-4</sub> within a ~55 kb MDR region (Figure 4A), and pMS7884B, a smaller

298 untypeable plasmid of 126,208 bp. The pMS7884A MDR region harbours two different class 1  
 299 integrons (In37 and In809) as well as a composite transposon conferring resistance to tetracycline  
 300 and chloramphenicol (Figure 4A). BLASTn and read-mapping analysis revealed the presence of  
 301 identical plasmids in all but one of the 18 isolates sequenced by Illumina in this study: isolate  
 302 MS7889 is predicted to have lost a ~34 kb region from its MDR plasmid, including *bla*<sub>IMP-4</sub>, due to  
 303 homologous recombination between two almost identical aminoglycoside resistance genes (Figure  
 304 4B). Notably in 15% of cases, sub-culture of MS7884 in the absence of meropenem selection  
 305 resulted in loss of *bla*<sub>IMP-4</sub> or the entire plasmid. Further details of the complete MS7884 genome  
 306 and plasmid analysis are presented in the supplementary appendix.

307

### 308 **Continued WGS surveillance reveals persistence of outbreak and transfer of *bla*<sub>IMP-4</sub> plasmid**

309 Ongoing surveillance has been in place for *bla*<sub>IMP-4</sub> positive *E. hormaechei* isolates within the  
 310 hospital since 2015. In 2016, during an unrelated outbreak, a *bla*<sub>IMP-4</sub> positive *E. hormaechei* was  
 311 isolated (MS14389) and following Illumina sequencing found to be only 2 SNPs different from the  
 312 2015 isolates, demonstrating continued persistence in the hospital environment (Figure S6).

313 In 2017, another *bla*<sub>IMP-4</sub> positive *E. hormaechei* (MS14449) was isolated from the Hematology  
 314 ward. Oxford Nanopore MinION sequencing has advanced in recent years to provide long-read  
 315 sequencing and real-time analysis of bacterial isolates. However, no method has been established  
 316 for its use in rapidly contextualising new isolates during ongoing outbreaks. Using the *de novo*  
 317 Nanopore assembly and contextualising it against publicly available *E. cloacae* complex strains  
 318 plus the outbreak isolates using whole genome alignment we were able to determine that this *E.*  
 319 *hormaechei* was clonally unrelated to the 2015 outbreak isolates, but did carry an identical IncHI2  
 320 plasmid (Figure S7-S9). A *bla*<sub>IMP-4</sub> positive *K. pneumoniae* isolate (MS14448) taken from the same  
 321 patient was also sequenced (using only Illumina short-read sequencing) and found to carry a near  
 322 identical IncHI2 plasmid, albeit missing a small section of the MDR region (Figure S10).

323

## 324 Shotgun metagenomic sequencing reveals *E. hormaechei* ST90 and IncHI2 plasmid in hospital 325 environment

326 Despite continued routine surveillance of the hospital environment using traditional culture methods  
327 an environmental source for the ST90 *E. hormaechei* was not found. In July 2018, 50 swab and  
328 water samples from the ICU and Burns ward environments were collected in response to an  
329 unrelated outbreak and subjected to both shotgun metagenomic sequencing and traditional culturing  
330 (Supplementary Dataset S2). From this round of surveillance, *Klebsiella oxytoca*, *E. cloacae*  
331 complex and *Leclercia adecarboxylata* were detected via traditional culturing methods from four  
332 samples (Table S7), however Illumina sequencing of these isolates determined that they were  
333 unrelated to the outbreak. Despite being clonally unrelated, three samples were found to carry a  
334 *bla*<sub>IMP-4</sub>-like gene (based on Real-Time PCR), which upon further inspection of the sequencing data  
335 corresponded to an IncHI2 plasmid with high similarity to pMS7884A (Supplementary Figure S11).  
336 While traditional culturing was unable to detect the ST90 *E. hormaechei*, metagenomic sequencing  
337 identified two samples with high confidence matches to the ST90 *E. hormaechei* reference MS7884  
338 and the IncHI2 plasmid pMS7884A. Nucleotide comparison of the metagenomic assembled  
339 genomes (MAGs) for these samples (R5514 and R5537, both taken from floor drains) to our *E.*  
340 *hormachei* reference genome revealed a high level of nucleotide identity across the entirety of the  
341 chromosome and plasmid (Supplementary Figures 12 and 13). MLST analysis of both MAGs was  
342 also able to detect several similar, albeit incomplete, alleles for ST90 (Table S8). Additionally,  
343 screening for resistance genes identified the *bla*<sub>IMP-4</sub> gene in both samples, further supporting the  
344 presence of an ST90 *E. hormaechei* and an IncHI2 plasmid similar to pMS7884A in these samples.  
345 Analysis of three other environmental samples (R5505, R5506 and R5522) recovered fewer than  
346 5% of total reads that mapped to the reference *E. hormaechei* MS7884 genome, compared to 25%  
347 and 20% for our positive samples R5514 and R5537 respectively (Table S8, Supplementary dataset  
348 2). This low number of reads was insufficient to confidently identify the ST90 *E. hormaechei* or  
349 IncHI2 plasmid of interest in these samples (Table S8 and Supplementary Figures 12 and 13).

## 350 **Discussion**

351 While there has been a dramatic improvement in the cost and availability of whole genome  
352 sequencing (WGS), it is not clear how these advances can best be incorporated into routine clinical  
353 microbiology. Several studies have demonstrated the ability of WGS to provide optimal  
354 discrimination between strains to help inform a response to outbreaks or nosocomial acquisition<sup>37-</sup>  
355 <sup>40</sup>. Here, we demonstrate that an integrated WGS approach can help rapidly characterize an  
356 outbreak in a critical care setting, particularly regarding transmission pathways. We highlight how  
357 WGS can be used to link contemporary outbreak isolates to historical isolates to inform infection  
358 control and incorporate long-read sequencing technologies to resolve complete genomes (including  
359 plasmids) and to rapidly resolve suspected outbreak cases. Finally, we demonstrate the potential of  
360 using complete genome sequences to interrogate environmental shotgun metagenomic sequencing  
361 data to identify outbreak sources.

362

363 The finding that the outbreak strains were virtually indistinguishable from an IMP-4-producing *E.*  
364 *hormaechei* isolated two years previously from the same unit was unexpected and highlighted the  
365 need to consider environmental sources and potential person-to-person transmission, as has been  
366 previously described in Australian ICU and burns units<sup>14</sup>. Despite ongoing surveillance, traditional  
367 culture-based detection methods were unable to find the ST90 *E. hormaechei* in the environment.  
368 Direct DNA extraction and metagenomic sequencing has in recent years revolutionised infectious  
369 disease surveillance, allowing detection of all microorganisms in a sample without the biases and  
370 limitations of traditional pathogen detection<sup>41</sup>. Using metagenomic sequencing and a high quality  
371 complete reference genome we were able to detect two samples with high confidence hits to an  
372 ST90 *E. hormaechei* and an IncHI2 plasmid, confirming its presence in the environment. We were  
373 also able to observe the overall community profile within each environmental sample, making  
374 metagenomic sequencing a powerful infection control and surveillance tool for tracking (i) the types  
375 of bacteria present in the environment, (ii) the types of resistance genes circulating, and (iii) the



effectiveness of environmental cleaning. Metagenomic sequencing does, however, have certain limitations when considering its implementation in routine infection control, including the necessity for a reasonable amount of starting DNA, and the chance of amplification inhibition during library preparation (causing low yield or failed sequencing). Metagenomic sequencing can also be quite costly<sup>42</sup>, as the sequencing output needs to be sufficiently high to provide an accurate population structure and detect low-abundance organisms. In our study, while metagenomic sequencing of the environmental samples yielded positive results, it is still unclear how these reservoirs are causing reinfection in patients. It is possible that healthcare workers are somehow involved, with previous studies confirming carriage of a range of clinically important bacteria<sup>43-45</sup>.

Using SMRT sequencing technology, we determined the full context of *bla*<sub>IMP-4</sub> and its location within a large, complex and highly repetitive MDR region harbouring two integrons: In37 and In809. In37 is a widespread class 1 integron that has been found in many bacterial species<sup>46,47</sup>. In809, which carries *bla*<sub>IMP-4</sub>, has previously been described from *K. pneumoniae* (GenBank: KF250428.1, HQ419285.1, AJ609296.3), *E. cloacae* (GenBank: JX101693.1) and *Acinetobacter baumannii* (GenBank: AF445082.1, DQ532122.1) in various plasmid backgrounds including IncA/C2<sup>48</sup>, IncL/M and IncF<sup>49</sup>. Most recently, a carbapenemase-producing *Salmonella* sp. isolated from a domestic cat in Australia was shown to contain *bla*<sub>IMP-4</sub> within an IncHI2 MDR plasmid (pIMP4-SEM1)<sup>50</sup>. Remarkably, we found that pIMP4-SEM1 was near identical to pMS7884A (Figure S5). This finding highlights the role of domestic animals (or the food they eat) as a reservoir for antibiotic resistance genes.

Analysis of several CPE in this study suggested that a common plasmid or integron carrying multiple antibiotic resistance genes is likely the major driver of antibiotic resistance dissemination across a broad range of Enterobacteriaceae. In addition to the presence of *bla*<sub>IMP-4</sub>, four resistance genes (*bla*<sub>TEM-1b</sub>, *bla*<sub>IMP-4</sub>, *qnrB*, and *aac(6')-Ib*) carried by these isolates were previously detected



by PCR in the majority of 29 IMP-4-producing *E. cloacae* complex isolates surveyed from Queensland hospitals between June 2009 to March 2014<sup>13</sup>. Only one of these isolates was ST90, suggesting lateral transfer of these genes to different *Enterobacter* clones in Queensland before 2013. During ongoing surveillance at RBWH we identified an *E. hormaechei* isolate that also carried the *bla*<sub>IMP-4</sub> plasmid, but was not closely related to the outbreak isolates, suggesting ongoing lateral transfer within the hospital environment. In this instance the Oxford Nanopore MinION sequencing platform was instrumental in ruling out this isolate from the ongoing outbreak of *bla*<sub>IMP-4</sub> ST90 *E. hormaechei*. Our work highlights the potential for integrating this highly portable and rapid technology as part of the “genomic toolkit” for infection control alongside more established platforms. The capacity to recognise inter-species MDR plasmid transfer is also greatly enhanced by the availability of complete reference genomes, as demonstrated by the *bla*<sub>IMP-4</sub> positive *K. pneumoniae* isolate identified in this study.

There were significant discrepancies between meropenem MICs according to the testing modality used, with the Etest consistently testing as “susceptible/intermediate” (MIC  $\leq$  4 mg/L; range 0.5–4 mg/L) and Vitek2 as “resistant” (usually with MICs  $\geq$  16 mg/L). According to pharmacokinetic/pharmacodynamic (PK/PD) principles, provided the MIC to a carbapenem falls within a susceptible range, the agent may still be effective despite the presence of a carbapenemase<sup>51</sup>. Robust clinical data to help guide therapy are lacking and many clinicians rely on combination therapy to optimize efficacy against carbapenemase-producers, largely based on observational studies suggesting benefit<sup>52,53</sup>. The presence of carbapenemase genes may be missed if clinical breakpoints for carbapenem MICs are used<sup>35</sup>, however it can be rapidly ascertained by WGS, without *a priori* assumptions of which genes are likely to be present. A wealth of additional information that may influence clinical decisions can be obtained, such as the presence of other  $\beta$ -lactamases, factors that may regulate resistance gene expression (e.g. IS elements), mutations in outer-membrane proteins, or other known resistance genes.

## Conclusions

We used an integrated WGS approach to help elucidate genetic relationships between *bla*<sub>IMP-4</sub> carbapenemase-producing *E. hormaechei* identified from our ICU and Burns facility. Real-time application of this technology revealed an unexpected clonal relationship with a strain isolated from the same unit two years previously. Continued routine WGS surveillance has enabled detailed monitoring of the outbreak, with rapid nanopore sequencing crucial for ruling out a suspected case in a previously unaffected ward. Comparisons with other Enterobacteriaceae containing *bla*<sub>IMP-4</sub> isolated from surrounding hospitals revealed its carriage on a broad host range IncHI2 plasmid, assumed to be circulating via lateral gene transfer across different *E. cloacae* complex clones and also *E. coli*. SMRT sequencing enabled the genetic context of all resistance genes within this plasmid to be resolved and revealed the mechanism of loss of resistance genes in one *E. hormaechei* strain that reverted to a fully carbapenem-susceptible phenotype. The availability of a complete *E. hormaechei* reference chromosome and *bla*<sub>IMP-4</sub> plasmid were also instrumental in locating a suspected source of the outbreak in the hospital plumbing with shotgun metagenome sequencing. As WGS technologies become increasingly available, they are likely to prove essential tools for the clinical microbiology laboratory to respond to emergent infection control threats, and can be used in real-time to provide clinically meaningful information.

## Acknowledgements

We thank Krispin Hajkiewicz, Trish Hurst and Michelle Doidge (Infectious Diseases Department, RBWH, Brisbane, Australia) for collecting environmental samples used in this study.

## References:

- 1 Paterson, D. L. & Bonomo, R. A. Extended-spectrum beta-lactamases: a clinical update. *Clinical microbiology reviews* **18**, 657-686, doi:10.1128/CMR.18.4.657-686.2005 (2005).
- 2 Gupta, N., Limbago, B. M., Patel, J. B. & Kallen, A. J. Carbapenem-resistant Enterobacteriaceae: epidemiology and prevention. *Clinical infectious diseases : an official publication of the Infectious Diseases Society of America* **53**, 60-67, doi:10.1093/cid/cir202 (2011).
- 3 Sader, H. S., Biedenbach, D. J. & Jones, R. N. Global patterns of susceptibility for 21 commonly utilized antimicrobial agents tested against 48,440 Enterobacteriaceae in the SENTRY Antimicrobial Surveillance Program (1997-2001). *Diagnostic microbiology and infectious disease* **47**, 361-364 (2003).
- 4 World Health Organisation. Antimicrobial Resistance Global Report on surveillance. (WHO, Geneva, 2014).
- 5 Akova, M., Daikos, G. L., Tzouveleakis, L. & Carmeli, Y. Interventional strategies and current clinical experience with carbapenemase-producing Gram-negative bacteria. *Clinical microbiology and infection : the official publication of the European Society of Clinical Microbiology and Infectious Diseases* **18**, 439-448, doi:10.1111/j.1469-0691.2012.03823.x (2012).
- 6 Liu, Y. Y. *et al.* Emergence of plasmid-mediated colistin resistance mechanism MCR-1 in animals and human beings in China: a microbiological and molecular biological study. *The Lancet. Infectious diseases*, doi:10.1016/S1473-3099(15)00424-7 (2015).
- 7 Nordmann, P. & Poirel, L. The difficult-to-control spread of carbapenemase producers among Enterobacteriaceae worldwide. *Clinical microbiology and infection : the official*

- 474            *publication of the European Society of Clinical Microbiology and Infectious Diseases* **20**,  
475            821-830, doi:10.1111/1469-0691.12719 (2014).
- 476    8        Magiorakos, A. P. *et al.* Multidrug-resistant, extensively drug-resistant and pandrug-  
477            resistant bacteria: an international expert proposal for interim standard definitions for  
478            acquired resistance. *Clinical microbiology and infection : the official publication of the*  
479            *European Society of Clinical Microbiology and Infectious Diseases* **18**, 268-281,  
480            doi:10.1111/j.1469-0691.2011.03570.x (2012).
- 481    9        Turnidge, J., Gottlieb, T., Bell, J. *Enterobacteriaceae Sepsis Outcome Programme*  
482            *(EnSOP): 2013 Antimicrobial Susceptibility Report*,  
483            <[http://www.agargroup.org/files/AGAR EnSOP13 Web Report FINAL 2.pdf](http://www.agargroup.org/files/AGAR%20EnSOP13%20Web%20Report%20FINAL%20.pdf)> (2014).
- 484    10       Partridge, S. R. *et al.* Emergence of blaKPC carbapenemase genes in Australia.  
485            *International journal of antimicrobial agents* **45**, 130-136,  
486            doi:10.1016/j.ijantimicag.2014.10.006 (2015).
- 487    11       Wailan, A. M. *et al.* Genomic Characteristics of NDM-Producing Enterobacteriaceae  
488            Isolates in Australia and Their blaNDM Genetic Contexts. *Antimicrobial agents and*  
489            *chemotherapy* **60**, 136-141, doi:10.1128/AAC.01243-15 (2015).
- 490    12       Chang, L. W. *et al.* Managing a nosocomial outbreak of carbapenem-resistant Klebsiella  
491            pneumoniae: an early Australian hospital experience. *Internal medicine journal* **45**,  
492            1037-1043, doi:10.1111/imj.12863 (2015).
- 493    13       Sidjabat, H. E. *et al.* Dominance of IMP-4-producing enterobacter cloacae among  
494            carbapenemase-producing Enterobacteriaceae in Australia. *Antimicrobial agents and*  
495            *chemotherapy* **59**, 4059-4066, doi:10.1128/AAC.04378-14 (2015).
- 496    14       Leung, G. H., Gray, T. J., Cheong, E. Y., Haertsch, P. & Gottlieb, T. Persistence of related  
497            bla-IMP-4 metallo-beta-lactamase producing Enterobacteriaceae from clinical and  
498            environmental specimens within a burns unit in Australia - a six-year retrospective

499 study. *Antimicrobial resistance and infection control* **2**, 35, doi:10.1186/2047-2994-2-  
500 35 (2013).

501 15 Peleg, A. Y., Franklin, C., Bell, J. M. & Spelman, D. W. Dissemination of the metallo-beta-  
502 lactamase gene blaIMP-4 among gram-negative pathogens in a clinical setting in  
503 Australia. *Clinical infectious diseases : an official publication of the Infectious Diseases*  
504 *Society of America* **41**, 1549-1556, doi:10.1086/497831 (2005).

505 16 Herbert, S. *et al.* Large outbreak of infection and colonization with gram-negative  
506 pathogens carrying the metallo- beta -lactamase gene blaIMP-4 at a 320-bed tertiary  
507 hospital in Australia. *Infection control and hospital epidemiology* **28**, 98-101,  
508 doi:10.1086/508841 (2007).

509 17 Carter, I. in *PCR for Clinical Microbiology: An Australian and International Perspective*  
510 (eds Margret Schuller *et al.*) 423-427 (Springer Netherlands, 2010).

511 18 Bankevich, A. *et al.* SPAdes: A New Genome Assembly Algorithm and Its Applications to  
512 Single-Cell Sequencing. *J Comput Biol* **19**, 455-477, doi:10.1089/cmb.2012.0021  
513 (2012).

514 19 Gurevich, A., Saveliev, V., Vyahhi, N. & Tesler, G. QUAST: quality assessment tool for  
515 genome assemblies. *Bioinformatics* **29**, 1072-1075,  
516 doi:10.1093/bioinformatics/btt086 (2013).

517 20 Ondov, B. D. *et al.* Mash: fast genome and metagenome distance estimation using  
518 MinHash. *Genome biology* **17**, 132, doi:10.1186/s13059-016-0997-x (2016).

519 21 Jain, C., Rodriguez, R. L., Phillippy, A. M., Konstantinidis, K. T. & Aluru, S. High  
520 throughput ANI analysis of 90K prokaryotic genomes reveals clear species boundaries.  
521 *Nat Commun* **9**, 5114, doi:10.1038/s41467-018-07641-9 (2018).

522 22 David, M., Dzamba, M., Lister, D., Ilie, L. & Brudno, M. SHRiMP2: Sensitive yet Practical  
523 Short Read Mapping. *Bioinformatics* **27**, 1011-1012,  
524 doi:10.1093/bioinformatics/btr046 (2011).

- 525 23 Victorian-Bioinformatics-Consortium. *Nesoni*, <[https://github.com/Victorian-](https://github.com/Victorian-Bioinformatics-Consortium/nesoni)
- 526 [Bioinformatics-Consortium/nesoni](https://github.com/Victorian-Bioinformatics-Consortium/nesoni)> (2014).
- 527 24 Stamatakis, A. RAxML version 8: a tool for phylogenetic analysis and post-analysis of
- 528 large phylogenies. *Bioinformatics* **30**, 1312-1313, doi:10.1093/bioinformatics/btu033
- 529 (2014).
- 530 25 Treangen, T. J., Ondov, B. D., Koren, S. & Phillippy, A. M. The Harvest suite for rapid
- 531 core-genome alignment and visualization of thousands of intraspecific microbial
- 532 genomes. *Genome Biology* **15**, 1-15, doi:10.1186/s13059-014-0524-x (2014).
- 533 26 Inouye, M. *et al.* SRST2: Rapid genomic surveillance for public health and hospital
- 534 microbiology labs. *Genome medicine* **6**, 90, doi:10.1186/s13073-014-0090-6 (2014).
- 535 27 Compain, F. *et al.* Targeting relaxase genes for classification of the predominant
- 536 plasmids in Enterobacteriaceae. *International journal of medical microbiology : IJMM*
- 537 **304**, 236-242, doi:10.1016/j.ijmm.2013.09.009 (2014).
- 538 28 Zankari, E. *et al.* Identification of acquired antimicrobial resistance genes. *Journal of*
- 539 *Antimicrobial Chemotherapy* **67**, 2640-2644, doi:10.1093/jac/dks261 (2012).
- 540 29 Gupta, S. K. *et al.* ARG-ANNOT, a new bioinformatic tool to discover antibiotic
- 541 resistance genes in bacterial genomes. *Antimicrobial agents and chemotherapy* **58**, 212-
- 542 220, doi:10.1128/AAC.01310-13 (2014).
- 543 30 Li, H. & Durbin, R. Fast and accurate short read alignment with Burrows-Wheeler
- 544 transform. *Bioinformatics* **25**, 1754-1760, doi:10.1093/bioinformatics/btp324 (2009).
- 545 31 Wood, D. E. & Salzberg, S. L. Kraken: ultrafast metagenomic sequence classification
- 546 using exact alignments. *Genome biology* **15**, R46, doi:10.1186/gb-2014-15-3-r46
- 547 (2014).
- 548 32 Carver, T. J. *et al.* ACT: the Artemis Comparison Tool. *Bioinformatics* **21**, 3422-3423,
- 549 doi:10.1093/bioinformatics/bti553 (2005).

- 550 33 Alikhan, N. F., Petty, N. K., Ben Zakour, N. L. & Beatson, S. A. BLAST Ring Image  
551 Generator (BRIG): simple prokaryote genome comparisons. *BMC genomics* **12**, 402,  
552 doi:10.1186/1471-2164-12-402 (2011).
- 553 34 European Committee on Antimicrobial Susceptibility Testing. *Breakpoint tables for*  
554 *interpretation of MICs and zone diameters version 6.0*, <<http://www.eucast.org>>  
555 (2016).
- 556 35 European Committee on Antimicrobial Susceptibility Testing. *EUCAST guidelines for*  
557 *detection of resistance mechanisms and specific resistances of clinical and/or*  
558 *epidemiological importance*, <[http://www.eucast.org/resistance\\_mechanisms/](http://www.eucast.org/resistance_mechanisms/)>  
559 (2012).
- 560 36 Sidjabat, H. E., Heney, C., George, N. M., Nimmo, G. R. & Paterson, D. L. Interspecies  
561 transfer of blaIMP-4 in a patient with prolonged colonization by IMP-4-producing  
562 Enterobacteriaceae. *Journal of clinical microbiology* **52**, 3816-3818,  
563 doi:10.1128/JCM.01491-14 (2014).
- 564 37 Kanamori, H. *et al.* Next-Generation Sequencing and Comparative Analysis of  
565 Sequential Outbreaks Caused by Multidrug-Resistant *Acinetobacter baumannii* at a  
566 Large Academic Burn Center. *Antimicrob Agents Chemother* **60**, 1249-1257,  
567 doi:10.1128/aac.02014-15 (2015).
- 568 38 Koser, C. U. *et al.* Rapid whole-genome sequencing for investigation of a neonatal MRSA  
569 outbreak. *The New England journal of medicine* **366**, 2267-2275,  
570 doi:10.1056/NEJMoa1109910 (2012).
- 571 39 Stoesser, N. *et al.* Dynamics of MDR *Enterobacter cloacae* outbreaks in a neonatal unit  
572 in Nepal: insights using wider sampling frames and next-generation sequencing. *J*  
573 *Antimicrob Chemother* **70**, 1008-1015, doi:10.1093/jac/dku521 (2015).
- 574 40 Howden, B. P. *et al.* Genomic insights to control the emergence of vancomycin-resistant  
575 enterococci. *MBio* **4**, doi:10.1128/mBio.00412-13 (2013).



- 576 41 Miller, R. R., Montoya, V., Gardy, J. L., Patrick, D. M. & Tang, P. Metagenomics for  
577 pathogen detection in public health. *Genome medicine* **5**, 81, doi:10.1186/gm485  
578 (2013).
- 579 42 Forbes, J. D., Knox, N. C., Peterson, C. L. & Reimer, A. R. Highlighting Clinical  
580 Metagenomics for Enhanced Diagnostic Decision-making: A Step Towards Wider  
581 Implementation. *Comput Struct Biotechnol J* **16**, 108-120,  
582 doi:10.1016/j.csbj.2018.02.006 (2018).
- 583 43 Friedman, N. D. *et al.* Prevalence of Clostridium difficile colonization among healthcare  
584 workers. *BMC Infectious Diseases* **13**, 459, doi:10.1186/1471-2334-13-459 (2013).
- 585 44 Dulon, M., Peters, C., Schablon, A. & Nienhaus, A. MRSA carriage among healthcare  
586 workers in non-outbreak settings in Europe and the United States: a systematic review.  
587 *BMC Infectious Diseases* **14**, 363, doi:10.1186/1471-2334-14-363 (2014).
- 588 45 Lubbert, C. *et al.* Long-term carriage of Klebsiella pneumoniae carbapenemase-2-  
589 producing K pneumoniae after a large single-center outbreak in Germany. *American*  
590 *journal of infection control* **42**, 376-380, doi:10.1016/j.ajic.2013.12.001 (2014).
- 591 46 Quiroga, M. P. *et al.* Complex Class 1 Integrons with Diverse Variable Regions, Including  
592 aac(6')-Ib-cr, and a Novel Allele, qnrB10, Associated with ISCR1 in Clinical  
593 Enterobacterial Isolates from Argentina. *Antimicrobial Agents and Chemotherapy* **51**,  
594 4466-4470, doi:10.1128/aac.00726-07 (2007).
- 595 47 Wang, M. *et al.* Plasmid-Mediated Quinolone Resistance in Clinical Isolates of  
596 Escherichia coli from Shanghai, China. *Antimicrobial Agents and Chemotherapy* **47**,  
597 2242-2248, doi:10.1128/aac.47.7.2242-2248.2003 (2003).
- 598 48 Ho, P.-L. *et al.* pIMP-PH114 Carrying bla IMP-4 in a Klebsiella pneumoniae Strain is  
599 Closely Related to Other Multidrug-Resistant IncA/C2 Plasmids. *Current Microbiology*  
600 **68**, 227-232, doi:10.1007/s00284-013-0471-x (2014).



601 49 Roy Chowdhury, P. *et al.* Dissemination of Multiple Drug Resistance Genes by Class 1  
602 Integrons in *Klebsiella pneumoniae* Isolates from Four Countries: a Comparative Study.  
603 *Antimicrobial Agents and Chemotherapy* **55**, 3140-3149, doi:10.1128/aac.01529-10  
604 (2011).

605 50 Abraham, S. *et al.* Isolation and plasmid characterization of carbapenemase (IMP-4)  
606 producing *Salmonella enterica* Typhimurium from cats. *Scientific Reports* **6**, 35527,  
607 doi:10.1038/srep35527 (2016).

608 51 Morrill, H. J., Pogue, J. M., Kaye, K. S. & LaPlante, K. L. Treatment Options for  
609 Carbapenem-Resistant Enterobacteriaceae Infections. *Open forum infectious diseases* **2**,  
610 ofv050, doi:10.1093/ofid/ofv050 (2015).

611 52 Tumbarello, M. *et al.* Predictors of mortality in bloodstream infections caused by  
612 *Klebsiella pneumoniae* carbapenemase-producing *K. pneumoniae*: importance of  
613 combination therapy. *Clin Infect Dis* **55**, 943-950, doi:10.1093/cid/cis588 (2012).

614 53 Daikos, G. L. *et al.* Carbapenemase-producing *Klebsiella pneumoniae* bloodstream  
615 infections: lowering mortality by antibiotic combination schemes and the role of  
616 carbapenems. *Antimicrob Agents Chemother* **58**, 2322-2328, doi:10.1128/AAC.02166-  
617 13 (2014).

618

619

620 **Table 1: Antibiotic Resistance Profile as determined by Etest, Vitek2 and ResFinder**

| Patient                      |                     |                             | 1      |        | 2      |        |        |        | 3      |        |          |        |
|------------------------------|---------------------|-----------------------------|--------|--------|--------|--------|--------|--------|--------|--------|----------|--------|
| Strain (MS)                  |                     |                             | 7884   | 7885   | 7886   | 7887   | 7888   | 7889   | 7890   | 7891   | 7892     | 7893   |
| Source                       |                     |                             | ETT    | urine  | ETT    | urine  | blood  | urine  | ETT    | blood  | Leg swab | blood  |
| ST                           |                     |                             | 90     | 90     | 90     | 90     | 90     | 90     | 90     | 90     | 90       | 90     |
| Plasmid                      |                     |                             | IncHI2 | IncHI2 | IncHI2 | IncHI2 | IncHI2 | IncHI2 | IncHI2 | IncHI2 | IncHI2   | IncHI2 |
| MIC(mg/L) by E-test          |                     | Ertapenem                   | 1      | 2      | 4      | 2      | 0.5    | 0.032  | 2      | 0.5    | 0.5      | 2      |
|                              |                     | Imipenem                    | 2      | 1      | 4      | 8      | 1      | 0.5    | 2      | 1      | 1        | 4      |
|                              |                     | Meropenem                   | 0.5    | 1      | 4      | 2      | 0.5    | 0.032  | 2      | 1      | 0.5      | 0.5    |
|                              |                     |                             |        |        |        |        |        |        |        |        |          |        |
| β-lactams and Cephalosporins | Vitek2 <sub>1</sub> | Tim                         | ≥128   | ≥128   | ≥128   | ≥128   | ≥128   | 32     | ≥128   | ≥128   | ≥128     | ≥128   |
|                              |                     | Mer                         | ≥16    | ≥16    | ≥16    | ≥16    | ≥16    | ≤0.25  | ≥16    | ≥16    | ≥16      | ≥16    |
|                              |                     | Taz                         | 16     | 16     | 16     | 16     | 16     | 8      | 16     | 16     | 16       | 16     |
|                              |                     | Fox                         | ≥64    | ≥64    | ≥64    | ≥64    | ≥64    | ≥64    | ≥64    | ≥64    | ≥64      | ≥64    |
|                              |                     | Caz                         | ≥64    | ≥64    | ≥64    | ≥64    | ≥64    | ≤1     | ≥64    | ≥64    | ≥64      | ≥64    |
|                              |                     | Cro                         | 16     | 16     | 16     | 16     | 16     | ≤1     | 16     | 16     | 16       | 8      |
|                              |                     | Fep                         | 2      | 2      | 4      | 2      | 2      | ≤1     | 2      | 2      | 2        | 4      |
|                              | Res                 | <i>ampC</i>                 | +      | +      | +      | +      | +      | +      | +      | +      | +        | +      |
|                              |                     | <i>bla<sub>OXA-1</sub></i>  | +      | +      | +      | +      | +      | -      | +      | +      | +        | +      |
|                              |                     | <i>bla<sub>IMP-4</sub></i>  | +      | +      | +      | +      | +      | -      | +      | +      | +        | +      |
|                              |                     | <i>bla<sub>TEM-1B</sub></i> | +      | +      | +      | +      | +      | +      | +      | +      | +        | +      |
| Aminoglycosides              | Vitek2              | Ami                         | ≤2     | ≤2     | ≤2     | ≤2     | ≤2     | 8      | ≤2     | ≤2     | ≤2       | ≤2     |
|                              |                     | Gent                        | ≥16    | ≥16    | ≥16    | ≥16    | ≥16    | ≤1     | ≥16    | ≥16    | ≥16      | ≥16    |
|                              |                     | Tob                         | 8      | 8      | 8      | 8      | 8      | ≥16    | 8      | 8      | 8        | 8      |
|                              | Res                 | <i>strB</i>                 | +      | +      | +      | +      | +      | +      | +      | +      | +        | +      |
|                              |                     | <i>strA</i>                 | +      | +      | +      | +      | +      | +      | +      | +      | +        | +      |
|                              |                     | <i>aac(6')Ib-cr</i>         | +      | +      | +      | +      | +      | +      | +      | +      | +        | +      |
|                              |                     | <i>aac(3)-IId</i>           | +      | +      | +      | +      | +      | -      | +      | +      | +        | +      |
| Quinolones                   | Vitek2              | Cip                         | ≤0.25  | 0.5    | ≤0.25  | ≤0.25  | 0.5    | ≤0.25  | 0.5    | 0.5    | 1        | ≤0.25  |
|                              |                     | Nor                         | 2      | 2      | 2      | 2      | 2      | 0.5    | 2      | 2      | 2        | 1      |
|                              | Res                 | <i>qnrB2</i>                | +      | +      | +      | +      | +      | -      | +      | +      | +        | +      |
| Sulphonamide/Trimethoprim    | Vitek2              | Tmp/smx                     | ≥320   | ≥320   | ≥320   | ≥320   | ≥320   | ≥320   | ≥320   | ≥320   | ≥320     | ≥320   |
|                              | Res                 | <i>sull</i>                 | +      | +      | +      | +      | +      | +      | +      | +      | +        | +      |
|                              |                     | <i>dfrA18</i>               | +      | +      | +      | +      | +      | +      | +      | +      | +        | +      |
| Rifampicin                   | Res                 | <i>arr3</i>                 | +      | +      | +      | +      | +      | -      | +      | +      | +        | +      |
| Macrolide                    | Res                 | <i>mph(A)</i>               | +      | +      | +      | +      | +      | -      | +      | +      | +        | +      |
| Phenicols                    | Res                 | <i>catA2</i>                | +      | +      | +      | +      | +      | +      | +      | +      | +        | +      |
|                              |                     | <i>catB3</i>                | +      | +      | +      | +      | +      | +      | +      | +      | +        | +      |
| Tetracycline                 | Res                 | <i>tet(D)</i>               | +      | +      | +      | +      | +      | +      | +      | +      | +        | +      |

621  
622 <sup>1</sup>Res = ResFinder Antimicrobial Resistance gene database; Vitek = Vitek2 automated susceptibility  
623 MIC (mg/L): Tim=ticarcillin-clavulanate, Taz=piperacillin-tazobactam, Fox=cefoxitin,  
624 Caz=ceftazidime, Cro=ceftriaxone, Fep=cefepime, Mer=meropenem, Ami=amikacin,  
625 Gent=gentamicin, Tob=tobramycin, Cip=ciprofloxacin, Nor=norfloxacin, Tmp/smx=trimethoprim-  
626 sulphamethoxazole

## 627 **Figure Legends:**

628 **Figure 1: RBWH clinical case study outline:** Three burns patients were admitted to the RBWH  
 629 ICU ward in mid 2015. Patient 1 (Female, 43-years-old) and Patient 2 (Female, 58-years-old) were  
 630 admitted on the same day. Subsequent to admission, both patients developed carbapenem-resistant  
 631 *E. hormaechei* infections, with two samples taken from patient 1 (source = ETT [purple] and urine  
 632 [grey]), and 4 samples taken from patient 2 (source = ETT [purple], urine [grey], and blood [red]).  
 633 Patient 3 (Female, 39-years-old) was admitted 37 days after the patient 1 and 2 had been admitted  
 634 and after they had been discharged from the ICU. Patient 3 also developed infection due to a  
 635 carbapenem-resistant *E. cloacae* infection, and had 4 samples taken from ETT (purple), blood (red)  
 636 and wound sites (orange). After intensive antibiotic and antifungal treatment, the patient was  
 637 palliated on day 47 of ICU admission. Sequencing and genomics analysis of all 10 isolates was  
 638 undertaken following confirmation of all three patients being infected with *bla*<sub>IMP-4</sub>-producing *E.*  
 639 *hormaechei* (period shown in purple shading). Environmental swabbing was undertaken 65 days  
 640 after the initial admission of patient 1 and 2, and 29 days after the admission of patient 3 (orange  
 641 square).

642

643 **Figure 2: CPE isolate timeline and relationship matrix: A.** 10 isolates were collected from 3  
 644 patients at various time-points in mid 2015. Coloured blocks indicate the source of the isolated  
 645 strain: purple: respiratory, grey: urine, red: blood, and orange: wound. **B.** Relationship matrix (left)  
 646 shows specific core single nucleotide variant (SNV) differences identified between strains. Strains  
 647 within the same circle have identical core SNV profiles. Lines connecting circles represent  
 648 accumulating SNV differences between strains (not-to-scale), where each line represents one SNV  
 649 (including nucleotide deletion). Specific nucleotide differences between isolates are given in the  
 650 table in panel B. Locations and consequences of nucleotide change are shown in Supplementary  
 651 Dataset S1. All 11 isolates differed by 5 SNVs overall.

652

**Figure 3: Core SNP Maximum likelihood (ML) tree of Hospital A and B *E. hormaechei* isolates in relation to RBWH isolates:** Trimmed reads from 6 *E. hormaechei* isolates (Hospital A and B) were aligned to the reference *E. hormaechei* Ec11 (isolated in 2013 at the RBWH) to determine core single nucleotide polymorphisms (SNPs) between all isolates. Ec11 in this figure represents all 2015 RBWH isolates (n=10) as they were found to be near identical at the core genome level. 63,861 core SNPs were identified and used to generate a ML tree with RAxML (1000 bootstrap replicates), which determined no relationship between the RBWH isolates (pink) and the Hospital B (blue)/Hospital A (orange) isolates. Four closely related strains were identified from Hospitals A and B (red box). Alignment of trimmed reads from MS8077, MS8079 and MS7926 to MS7924 identified 117 core SNPs, however, a number of these SNPs were removed as they were identified as residing within transposon or phage regions. The remaining 58 core SNPs were used to generate a ML tree (1000 bootstrap replicates), showing that Hospital B strains differ by less than 20 SNPs.

**Figure 4: Large IncHI2 plasmid with ~55 kb multidrug resistance region containing IMP-4 carbapenemase: A.** A 330,060 bp IncHI2 plasmid carrying multiple resistance operons, including a large ~55 kb multidrug resistance (MDR) region, was fully recovered and assembled using Pacific Biosciences (PacBio) SMRT sequencing of strain MS7884 (patient 1, isolate 1). The multidrug resistance region was found to contain two class 1 integrons (In809, In37) along with several other antibiotic resistance genes, as indicated. Comparison of this MDR region to publicly available genomes found a close match to pEl1573, isolated in 2012 from an *E. cloacae* isolate in Sydney, Australia. **B.** A predicted model of homologous recombination between two nearly identical *aacA4/aac(6')-Ib-cr* genes (red asterisks) within the ~55 kb MDR region in MS7889 (patient 2, isolate 4, IMP-, carbapenem-susceptible) leading to the loss of a ~34 kb region containing *bla*<sub>IMP-4</sub> as well as several other antibiotic resistance genes.

679 **Figure 1**

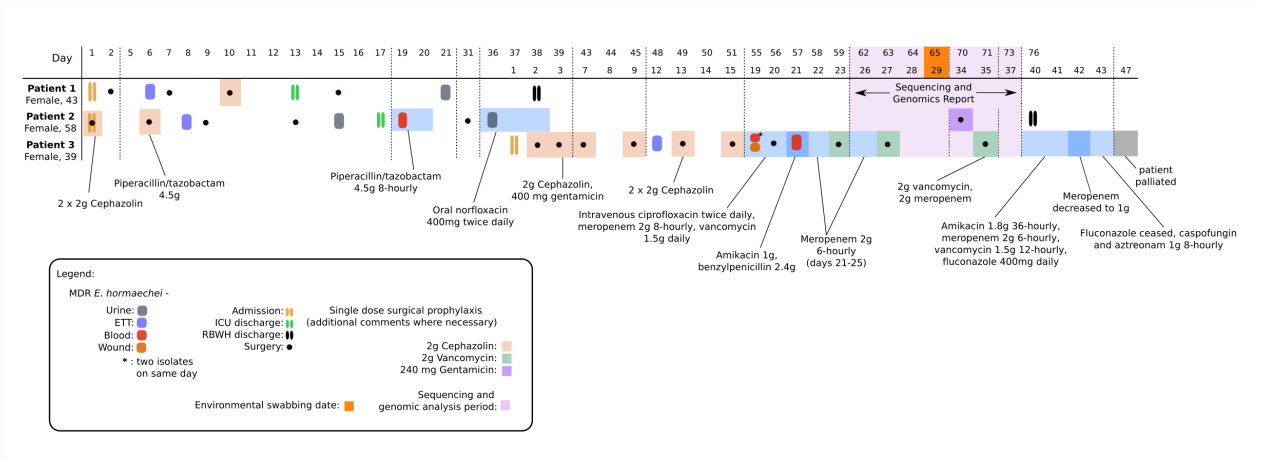

680  
681

682 **Figure 2**

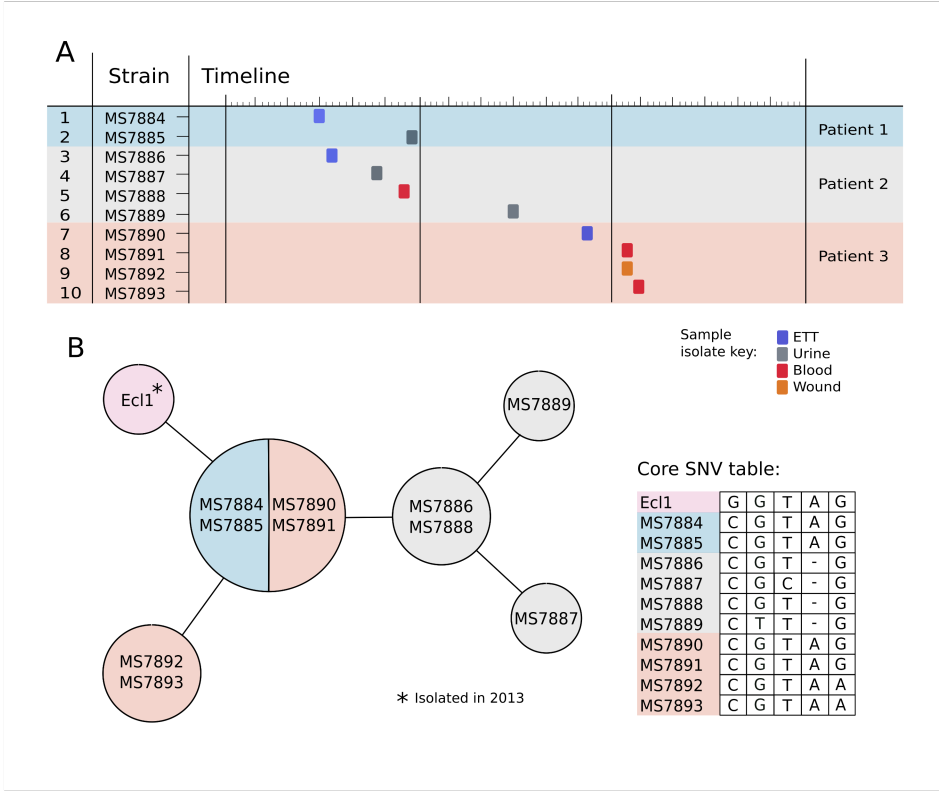

683  
684

685 **Figure 3**

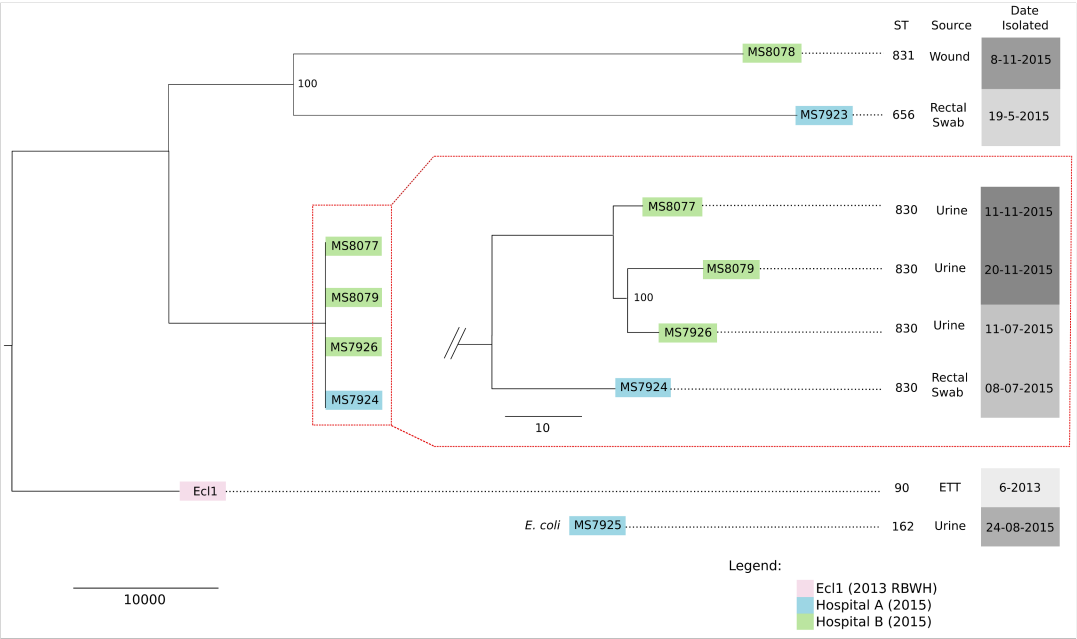

686

687

688 **Figure 4**

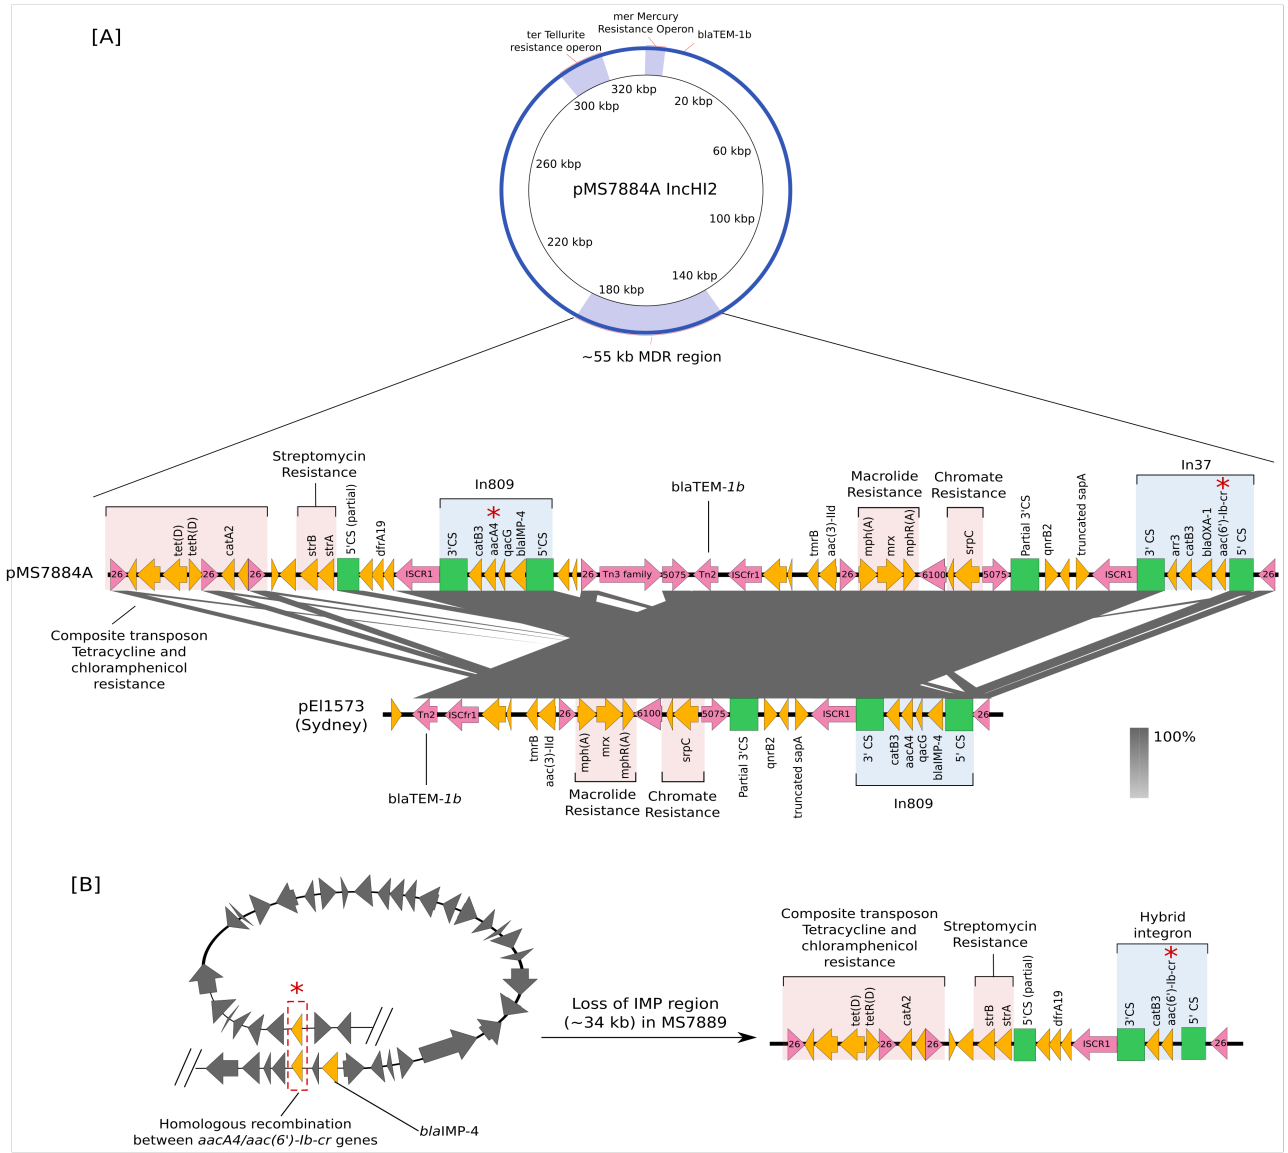

689
